# Supplementary material for: Preoxygenation in difficult airway management: high-flow oxygenation by nasal cannula versus face mask (the PREOPTIDAM study). Protocol for a single-centre randomised study
Source: PubMed Central journal article supplement — BMJ Open. 2019 Apr 25;9(4):e025909. doi: 10.1136/bmjopen-2018-025909 (PMC6501956; doi:10.1136/bmjopen-2018-025909), 2019-04-25
Supplement: bmjopen-2018-025909.draft_revisions.pdf [file bmjopen-2018-025909.draft_revisions.pdf]

# BMJ Open

BMJ Open is committed to open peer review. As part of this commitment we make the peer review history of every article we publish publicly available.

When an article is published we post the peer reviewers' comments and the authors' responses online. We also post the versions of the paper that were used during peer review. These are the versions that the peer review comments apply to.

The versions of the paper that follow are the versions that were submitted during the peer review process. They are not the versions of record or the final published versions. They should not be cited or distributed as the published version of this manuscript.

BMJ Open is an open access journal and the full, final, typeset and author-corrected version of record of the manuscript is available on our site with no access controls, subscription charges or pay-per-view fees (<http://bmjopen.bmj.com>).

If you have any questions on BMJ Open's open peer review process please email [info.bmjopen@bmj.com](mailto:info.bmjopen@bmj.com)

# BMJ Open

## Preoxygenation optimisation in difficult airway management (PREOPTI-DAM): high-flow nasal cannula oxygen versus standard device: protocol for a single-centre randomised study

|                               |                                                                                                                                                                                                                                                                                                                                                                                                                                                                                                                                                                                                                                                                                                                                                                                                                                                                                                                                                                                                                                                                                                                                                                                                                                                                                                                                                                                                                                                         |
|-------------------------------|---------------------------------------------------------------------------------------------------------------------------------------------------------------------------------------------------------------------------------------------------------------------------------------------------------------------------------------------------------------------------------------------------------------------------------------------------------------------------------------------------------------------------------------------------------------------------------------------------------------------------------------------------------------------------------------------------------------------------------------------------------------------------------------------------------------------------------------------------------------------------------------------------------------------------------------------------------------------------------------------------------------------------------------------------------------------------------------------------------------------------------------------------------------------------------------------------------------------------------------------------------------------------------------------------------------------------------------------------------------------------------------------------------------------------------------------------------|
| Journal:                      | <i>BMJ Open</i>                                                                                                                                                                                                                                                                                                                                                                                                                                                                                                                                                                                                                                                                                                                                                                                                                                                                                                                                                                                                                                                                                                                                                                                                                                                                                                                                                                                                                                         |
| Manuscript ID                 | bmjopen-2018-025909                                                                                                                                                                                                                                                                                                                                                                                                                                                                                                                                                                                                                                                                                                                                                                                                                                                                                                                                                                                                                                                                                                                                                                                                                                                                                                                                                                                                                                     |
| Article Type:                 | Protocol                                                                                                                                                                                                                                                                                                                                                                                                                                                                                                                                                                                                                                                                                                                                                                                                                                                                                                                                                                                                                                                                                                                                                                                                                                                                                                                                                                                                                                                |
| Date Submitted by the Author: | 24-Aug-2018                                                                                                                                                                                                                                                                                                                                                                                                                                                                                                                                                                                                                                                                                                                                                                                                                                                                                                                                                                                                                                                                                                                                                                                                                                                                                                                                                                                                                                             |
| Complete List of Authors:     | <p>VOURC'H, Mickael; Centre Hospitalier Universitaire de Nantes, Service d'Anesthésie-Réanimation; Centre Hospitalier Universitaire de Nantes, UPRES EA 3826, "Thérapeutiques Cliniques et Expérimentales des infections", IRS2 Nantes Biotech</p> <p>Huard, Donatien; Centre Hospitalier Universitaire de Nantes, Service d'Anesthésie-Réanimation</p> <p>FEUILLET, Fanny; Centre Hospitalier Universitaire de Nantes, Methodology and Biostatistics Platform, Research Promotion Department</p> <p>BAUD, Gabrielle; Centre Hospitalier Universitaire de Nantes, Service d'Anesthésie-Réanimation</p> <p>GUICHOUX, Arthur; Centre Hospitalier Universitaire de Nantes, Service d'Anesthésie-Réanimation</p> <p>SURBLED, Marielle; Centre Hospitalier Universitaire de Nantes, Service d'Anesthésie-Réanimation</p> <p>TISSOT, Melanie; Centre Hospitalier Universitaire de Nantes, Service d'Anesthésie-Réanimation</p> <p>CHIFFOLEAU, Anne; Centre Hospitalier Universitaire de Nantes, Unité de vigilance des essais cliniques,</p> <p>GUITTON, Christophe; Centre Hospitalier de Mans, Médecine intensive réanimation</p> <p>Jaber, S.; Montpellier Univ Hosp, Anesthesia and Critical Care</p> <p>Asehnoune, Karim; Centre Hospitalier Universitaire de Nantes, Service d'Anesthésie-Réanimation; Centre Hospitalier Universitaire de Nantes, UPRES EA 3826, "Thérapeutiques Cliniques et Expérimentales des infections", IRS2 Nantes Biotech,</p> |
| Keywords:                     | High-Flow Nasal Cannula, anticipated difficult intubation, fiberoptic intubation, video-laryngoscopy, Apneic oxygenation                                                                                                                                                                                                                                                                                                                                                                                                                                                                                                                                                                                                                                                                                                                                                                                                                                                                                                                                                                                                                                                                                                                                                                                                                                                                                                                                |
|                               |                                                                                                                                                                                                                                                                                                                                                                                                                                                                                                                                                                                                                                                                                                                                                                                                                                                                                                                                                                                                                                                                                                                                                                                                                                                                                                                                                                                                                                                         |

SCHOLARONE™  
Manuscripts

**TITLE PAGE****Preoxygenation optimisation in difficult airway management (PREOPTIDAM): high-flow nasal cannula oxygen versus standard device: protocol for a single-centre randomised study**

Mickael Vourc'h,<sup>1,2</sup> Donatien Huard,<sup>1</sup> Fanny Feuillet,<sup>3</sup> Gabrielle Baud,<sup>1</sup> Arthur Guichoux,<sup>1</sup> Marielle Surbled,<sup>1</sup> Melanie Tissot,<sup>1</sup> Anne Chiffolleau,<sup>4</sup> Christophe Guitton,<sup>5</sup> Samir Jaber,<sup>6</sup> Karim Asehnoune<sup>1,2\*</sup>

## Affiliations

1 Departments of Anaesthesiology and Surgical Intensive Care, Hôtel-Dieu, University Hospital of Nantes, 44093 Nantes, France

2 UPRES EA 3826, "Thérapeutiques Cliniques et Expérimentales des infections", IRS2 Nantes Biotech, France

3 Methodology and Biostatistics Platform, Research Promotion Department, University Hospital of Nantes, 44093 NANTES, FRANCE and UMR 1246 SPHERE "Methods for Patient-centered outcomes & Health Research, Nantes University, Tours University 44035 Nantes, France

4 Unité de vigilance des essais cliniques, Nantes University Hospital, Nantes, France

5 Intensive Care Unit, General Hospital Center, Le Mans, France

6 Medical-Surgical Intensive Care Unit, University Hospital of Montpellier and INSERM U1046, 34295 Montpellier, France

\*Correspondence to Karim Asehnoune, MD, PhD, Department of Anaesthesiology and Surgical Intensive Care, Hôtel-Dieu, University Hospital of Nantes, 44093 Nantes, France, Karim.asehnoune@chu-nantes.fr, +33(0)253009182

Word count: 2844 adapter après modif

## ABSTRACT

**Introduction:** Although preoxygenation and airway management respond to precise algorithms, difficult endotracheal intubation (ETI) remains a daily challenge in Intensive Care Units (ICU) and operating rooms because of its frequent complications, including hypoxaemia. High-flow oxygenation by nasal cannula (HFNC) could improve preoxygenation and has been reported to achieve apnoeic oxygenation. To prevent desaturation during difficult ETI, recent guidelines recommend the use of this device, but its efficiency has never been evaluated until now.

**Methods and analysis:** The PREOPTIDAM trial is a prospective, single-centre, randomised, controlled study in Nantes University Hospital. We hypothesized that HFNC can decrease the incidence of desaturation  $\leq 94\%$  or manual FMV along ETI from 16 to 4% compared to facial mask. Using a two-sided t-test with a first species risk of 5 % and 80 % power, a total of 186 patients with risk factors for difficult intubation (DI) and requiring ETI for planned surgery will be included. Using a computer-generated randomization, with a 1:1 allocation ratio, patients will be randomised to HFNC or standard pre-oxygenation. Randomisation will be stratified on intubation device: laryngoscopy after crash induction or fiberoptic intubation (FOI) under sedation. The primary objective is to determine whether HFNC is more efficient than standard oxygenation techniques to prevent desaturation  $\leq 94\%$  or face-mask ventilation (FMV) during DI. Intent-to-treat and per-protocol analysis are planned for the primary outcome.

**Ethics and dissemination:** The study project has been approved by an independent ethics committee. Oral and written information will be provided before study inclusion. Participant

1  
2  
3 recruitment begins in september 2018. Results will be submitted to international peer-  
4  
5 reviewed medical journals.  
6  
7  
8  
9

10 **Trial registration number:** NCT03604120, registered in July 2018.  
11  
12  
13

14  
15 **Keywords:** High-Flow Nasal Cannula, anticipated difficult intubation, fiberoptic intubation,  
16  
17 video-laryngoscopy, Apneic oxygenation  
18  
19  
20  
21  
22

23 **Abbreviations:**

24 ASA: American Society of Anesthesiology  
25  
26

27 SFAR: French Society of Anesthesia and Intensive Care  
28  
29

30 HFNC: high flow nasal cannula  
31  
32

33 ETI: endo-tracheal intubation  
34  
35

36 FOI: fiberoptic intubation  
37  
38

39 DI: difficult Intubation  
40  
41

42 FMV: face-mask ventilation  
43  
44

45 FiO2: fraction of inspired oxygen  
46  
47

48 PACU: post-anaesthesia care unit  
49  
50

51 RASS: Richmond agitation-sedation scale  
52  
53

54 eCRF: electronic case report form  
55  
56

57 FPH: Fisher & Paykel Healthcare  
58  
59  
60

## Article Summary

### Strengths and limitations of this study:

- PREOPTIDAM is the first prospective, randomized, controlled study evaluating HFNC ability to perform apneic oxygenation during anticipated difficult airway control in order to prevent desaturation
- Broad inclusion criteria and large sample size will support external validity.
- Pragmatic study protocol reflects every day practice and results will be of high clinical relevance.
- As no data is available on desaturation (<95%) incidence among anticipated DI, an interim analysis will be carried out to allow re-estimating the sample size to maintain power.

## INTRODUCTION

The last French epidemiology survey pointed out that despite major safety improvement over the last decades, substantial morbidity and mortality remains in anaesthesia.[1] Hypoxaemia represented 20% of these severe adverse events.[2,3]

Although airway management and preoxygenation sequence respond to precise algorithms, anticipated DI remains a daily challenge and a major cause of hypoxaemia during anaesthesia.[4-6] Moreover, DI increases first-attempt failure and long-lasting procedure incidence leading to repeated manual face-mask ventilation (FMV) to correct or prevent desaturation. FMV often requires deepening anaesthesia, leading to severe hypotension. FMV also gives rise to gastric insufflation or active gag reflex and provokes vomiting or aspiration.

Preoxygenation, which consists in fulfilling functional residual capacity with pure oxygen, is the cornerstone of patient safety during ETI. Increasing oxygen reserve is the best way to extend safe apnoea duration and therefore to avoid hypoxaemia and its related complications.[7] Current preoxygenation guidelines suggest performing 8 vital capacities or 3 minutes of spontaneous breathing with a standard face mask, at  $FiO_2=1$ . [8,9] Despite well-conducted preoxygenation, the rate of desaturation  $< 90\%$  can reach 21% in case of DI.[10] In order to reduce desaturation in anticipated DI, two options are available. The first is fiberoptic intubation (FOI) under local anaesthesia and sedation for anticipated "cannot ventilate" or limited mouth-opening patients.[11] FOI preserves the patient's spontaneous breathing and avoids major hypoxaemia in case of difficult and long lasting airway control.[12] The second option is to intubate after induction of general anaesthesia with

1  
2  
3 either a standard or a video laryngoscope and to maintain oxygenation throughout apnoea  
4  
5 until the end of ETI.  
6

7  
8 HFNC would appear to be an innovative device to achieve apnoeic oxygenation.[13]  
9  
10 Throughout ETI, holding the nasal prongs in place during FOI or laryngoscopy can enable the  
11  
12 continuation of oxygenation.[14] It delivers humidified and heated oxygen up to 70 L/min  
13  
14 with FiO<sub>2</sub> close to 100% and has also been reported to generate supra-glottic end expiratory  
15  
16 pressure. Its efficacy as an apnoeic oxygenation device has already been reported during  
17  
18 ETI.[15,16] As a preoxygenation device, HFNC has also been studied in the ICU and in  
19  
20 operating theatres with controversial results.[17,18] However, in DI settings, recent  
21  
22 observational studies have suggested the ability of HFNC to extend safe apnoea time and to  
23  
24 be held during FOI.[19,20]  
25  
26  
27

28  
29 Considering its theoretical advantages and recent recommendations,[9,21] HFNC must  
30  
31 be assessed during preoxygenation and apnoeic oxygenation in case of anticipated DI. Up to  
32  
33 now, no large randomised study has compared HFNC oxygenation with standard of care. Our  
34  
35 objective will be to evaluate HFNC accuracy as a pre-oxygenation and apnoeic oxygenation  
36  
37 device during anticipated DI compared with standard of care. We hypothesise that HFNC  
38  
39 could reduce desaturation during ETI and in the following two minutes.  
40  
41  
42  
43  
44  
45  
46  
47  
48  
49  
50  
51  
52  
53  
54  
55  
56  
57  
58  
59  
60



## METHOD AND ANALYSIS

### Objectives

- Primary objective:

To compare the effectiveness of HFNC (interventional group) as a preoxygenation and apnoeic oxygenation device versus face mask (standard method) for anticipated DI.

- Secondary objectives:

To compare ETI related complications and patient outcome until post-anaesthesia care unit (PACU) discharge with each device.

### Trial design

PREOPTIDAM will be a prospective, single-centre, open-label, randomised controlled study. The randomisation sequence will be computer-generated and stratified on intubation method (laryngoscopy or fibroscopy) according to the attending physician's decision. This study will adhere to the international recommendations for interventional trials.

### Study settings

The study will take place at the Nantes University Hospital, France.

### Hypothesis

We hypothesise that HFNC could reduce the incidence of desaturation  $\leq 94\%$  or the necessity for manual FMV in case of first attempt failure of ETI.

## Participant eligibility and consent

Trial site investigators will identify consecutive eligible patients from the listed criteria.

Eligible patients will receive written and oral information. They will be included after investigators have obtained informed written consent.

### - Inclusion criteria

- Adults aged from 18 to 90 years.
- 1 major or 2 minor criteria of anticipated DI.

Anticipated DI criteria derived from international guidelines and recent publications[22-24]:

- 1 major criterion:
  - Past DI.
  - Past laryngeal surgery or radiotherapy.
  - Limited mouth opening < 25mm.
  - Fixed flexion of the cervical spine.
  - Mallampati IV.
  - Tumour in the oral or laryngeal region.

### OR

- At least 2 minor criteria:
  - Thyromental distance < 65mm.
  - Limited mouth opening < 35 mm and > 25mm.
  - Mallampati III.
  - Limitation of cervical mobility  $\leq 35^\circ$ .
  - Neck perimeter > 40 cm for men and > 38 cm for women.
  - Retrognathism.

1  
2  
3 - **Non-inclusion criteria**

- 4
- 5 • BMI > 35 kg/m<sup>2</sup>.
  - 6
  - 7 • Pulse oximetry < 90% in ambient air.
  - 8
  - 9
  - 10 • Haemodynamic instability.
  - 11
  - 12 • Protected adult.
  - 13
  - 14 • Pregnancy.
  - 15
  - 16 • Lack of consent.
  - 17
  - 18 • Patient already enrolled in another randomised study to improve preoxygenation
  - 19 quality.
  - 20
  - 21
  - 22
  - 23

24 **Assignment of interventions**

25

26

27 - **Allocation**

28

29

30 Randomisation will be centralised, web-based and accessible 24 hours a day. The

31

32 randomisation sequence will be carried out in blocks (1:1 ratio) and stratified according to

33

34 intubation sequence (laryngoscopy or fibroscopy).

35

36

37 - **Sequence generation**

38

39

40 The randomisation sequence will be generated by a statistician working at the Clinical

41

42 Research Unit of Nantes University Hospital and not involved in patient recruitment. The

43

44 software used to collect the data in the eCRFs will automatically allocate patients, thereby

45

46 ensuring concealment. The physicians and a clinical research nurse and/or clinical research

47

48 assistant will screen the patients and include those who are eligible for the study.

49

50

51

52

53

54

55

56

57

58

59

60

1  
2  
3 - **Blinding**  
4

5 Blinding of healthcare workers and patients to the type of preoxygenation device is not  
6  
7 feasible. However, the primary outcome is assessed on the basis of an objective criterion.  
8  
9

10 **Trial intervention**  
11

12  
13 After anticipated DI criteria detection by the anaesthetist during the pre-operative  
14  
15 consultation, the patients will be randomly assigned to (**see Figure 1: Study intervention**):  
16

- 17  
18 - HFNC preoxygenation for 4 minutes set at 70L/min air flow and  $FiO_2 = 1$  before  
19  
20 intubation. HFNC will be maintained throughout the FOI or laryngoscopic intubation  
21  
22 procedure to attempt to achieve oxygenation.  
23

24  
25  
26 or  
27

- 28 - Standard preoxygenation for 4 minutes (15L/min,  $FiO_2 = 1$ ).  
29  
30  
31 • With standard face mask for ETI under laryngoscopy after rapid sequence induction  
32  
33 of general anaesthesia. The standard face mask will be removed after induction to  
34  
35 enable intubation.  
36

37  
38 or  
39

- 40 • With an endoscopy mask for FOI under sedation and local naso-pharyngeal  
41  
42 anaesthesia in a spontaneously breathing patient. The mask will be kept in place  
43  
44 throughout the intubation procedure.  
45

46  
47 Clinical data will be collected throughout ETI, surgery, and until discharge of the PACU.  
48  
49

50 **Concomitant medication/treatment**  
51

52  
53 The drugs for general anaesthesia or sedation and ETI devices will be left to the discretion of  
54  
55 the attending physician.  
56  
57

### Participant withdrawal

Patients will be excluded from the trial if they withdraw their consent after randomisation.

However, if the patient does not object, the data already collected until consent withdrawal will be analysed. If the patient refuses, the data will be deleted.

### Participant timeline and schedule (see Table 1)

**Title Table 1:** Participants timeline

|                     | Anesthesia consultation | Pre-operative visit | Inclusion | Intubation & surgery | PACU | PACU discharge |
|---------------------|-------------------------|---------------------|-----------|----------------------|------|----------------|
| Eligibility?        | X                       | X                   |           |                      |      |                |
| Information         | X                       | X                   |           |                      |      |                |
| Written consent     |                         | X                   |           |                      |      |                |
| Randomization       |                         |                     | X         |                      |      |                |
| Data collection     |                         |                     |           | X                    | X    |                |
| Exit from the study |                         |                     |           |                      |      | X              |

**Legends Table 1:** After written informed consent, the patient will be randomized and preoxygenation will be performed accordingly. Patients will be followed until the Post-Anesthesia Care Unit (PACU) discharge.

### Patient and Public Involvement

Patients were not directly involved in the development of the research question or the design of the study. However, the primary and secondary outcomes of the PREOPTIDAM study impact patients' safety and comfort. A written summary of the study results will be sent to requesting participants by mail.

1  
2  
3 Participants experience of the intervention will be assess before PACU discharge. This  
4 assessment is one of the secondary outcome.  
5  
6  
7

## 8 **Outcome measures**

9

### 10 **Primary outcome measure**

11  
12  
13 We will compare the incidence of desaturation  $\leq 94\%$  or manual FMV during the procedure  
14 between the HFNC and face mask groups.  
15

- 16  
17  
18 - For ETI under laryngoscopy, the primary criterion will be assessed from the induction of  
19 general anaesthesia to 2 minutes following ETI.  
20  
21  
22  
23 - For FOI, the primary criterion will be assessed from the beginning of sedation to 2  
24 minutes following ETI.  
25  
26

27  
28 Arterial oxygen saturation will be assessed by non-invasive transcutaneous pulse  
29 oximetry (SpO<sub>2</sub>). The evaluation period of SpO<sub>2</sub> will be extended to 2 minutes following ETI  
30 completion owing to possible delayed detection of desaturation with this device.  
31  
32

33  
34 After the first ETI attempt failure, FMV will be left to the discretion of the attending  
35 physician. In this setting, we believe that uninterrupted oxygenation by HFNC during apnoea  
36 will convince the anaesthetist not to proceed to FMV in the absence of desaturation.  
37  
38  
39  
40  
41  
42

### 43 **Secondary outcome measure**

44

- 45  
46 - Preoxygenation quality:
    - 47  
48 • SpO<sub>2</sub> at the beginning and the end of the preoxygenation.
  - 49  
50  
51 - ETI procedure:
    - 52  
53  
54 • Quality of exposure (Cormack grade).
- 55  
56  
57  
58  
59  
60

- 1  
2  
3 • ETI success, number of attempts, number of operators, number of alternative  
4 devices.  
5  
6  
7  
8 • IDS score.  
9  
10  
11 • FMV with or without desaturation.  
12  
13  
14 • For FOI: sedation quality, patient comfort, ease of tube and fiberoptic insertion,  
15 quality of glottis vision.  
16  
17  
18 - ETI related adverse events:  
19  
20  
21 • Severe complications:  
22  
23     ➤ Death, cardiac arrest.  
24  
25     ➤ Severe desaturation with SpO<sub>2</sub> < 90% or < 80%.  
26  
27     ➤ Severe cardiovascular collapse (systolic blood pressure < 80mmHg or the  
28 need to administer ephedrine or neosynephrine or norepinephrine).  
29  
30  
31  
32 • Mild-to-moderate complications  
33  
34     ➤ Intubation failure.  
35  
36  
37     ➤ Severe ventricular or supraventricular arrhythmia.  
38  
39  
40  
41     ➤ Oesophageal intubation.  
42  
43  
44  
45     ➤ Dental injury.  
46  
47  
48     ➤ Dangerous agitation defined as RASS >3 (Richmond Agitation-Sedation Scale).  
49  
50  
51     ➤ Vomiting with aspiration of gastric content.  
52  
53  
54     ➤ Naso-laryngo-tracheal injury or bleeding during laryngoscopy or FOI.  
55  
56  
57  
58  
59  
60

- 1  
2  
3 - Per-operative respiratory monitoring:  
4  
5  
6 • Higher FiO<sub>2</sub> required to obtain SpO<sub>2</sub> > 94%.  
7  
8 • Higher plateau pressure at 5 min, 30 min, 1 hour after ETI.  
9  
10  
11 • Higher insufflation pressure at 5 min, 30 min, 1 hour after ETI.  
12  
13  
14 • Achievement of recruitment manoeuvres for desaturation.  
15  
16  
17 • Tidal volume reduction owing to insufflation pressure > 40 mmHg.  
18  
19 - Morbidity in the PACU:  
20  
21  
22 • Nausea or vomiting.  
23  
24  
25 • Inspiratory dyspnoea after extubation.  
26  
27  
28 • Lowest SpO<sub>2</sub> recorded after extubation.  
29  
30  
31 • Desaturation < 90% or < 80% before or after extubation.  
32  
33  
34 • Oxygen therapy requirement at PACU discharge.  
35  
36  
37 • Length of stay.  
38  
39  
40 • Duration of mechanical ventilation.  
41  
42  
43 • Non-Invasive ventilation support.  
44  
45 • Reintubation for respiratory failure.  
46

#### 47 **Safety issues – Severe adverse events**

48 Severe adverse events will be immediately declared and analysed by the Pharmacovigilance

49 Department of the Nantes University Hospital.

50  
51  
52  
53  
54  
55  
56 Expected ETI related adverse events:  
57



- 1
- 2
- 3 - Severe desaturation <80%.
- 4
- 5 - Severe cardiovascular collapse.
- 6
- 7 - Cardiac arrest and death.
- 8
- 9

10 All of the expected or unexpected adverse event will be collected in the e-CRF.

11

12 The trial may be temporarily stopped for an individual patient at the discretion of the

13 attending physician if a severe adverse event is suspected to be associated with the studied

14 device.

15

16

17

18

19

### 20 **Statistics analysis and sample size calculation**

21

22

23 The primary outcome is the incidence of desaturation  $\leq 94\%$  or FMV during the ETI

24 procedure.

25

26

27

28 We hypothesise that HFNC can decrease the incidence of desaturation  $\leq 94\%$  or

29 manual FMV during ETI from 16% to 4% compared with the face mask. The incidence of

30 desaturation during anticipated DI has not been described specifically in the literature up to

31 now.[25] We hypothesise a 12% reduction in desaturation in HFNC based on our previous

32 study in the Intensive Care Unit (unpublished data). Using a two-sided *t*-test with a first

33 species risk of 5% and 80% power and considering 5% of consent withdrawal, we planned to

34 include 186 patients. We anticipated approximately 50 patients with FOI indication.

35

36

37

38

39

40

41

42

43

44 An interim analysis will be performed to enable re-estimation of the sample size to

45 maintain power.[26,27] It will be performed after inclusion of half of the total number of

46 patients (93 patients). The overall probability of the event will be estimated from the entire

47 sample of 93 patients.

48

49

50

51

52

53

54 For the primary outcome: a linear model will compare the incidence of desaturation

55

56

57

58

59

60

1  
2  
3 ≤ 94% or mask ventilation. Intent-to-treat and per-protocol analysis are planned for the  
4  
5 primary outcome.  
6

7  
8 We shall also perform sub-group analysis of the primary outcome regarding the type of  
9  
10 ETI (FOI or laryngoscopy).  
11

12  
13 The secondary outcomes will be described and compared between the two groups  
14  
15 with linear regression models, generalized mix models or survival models (Cox or Fine and  
16  
17 Gray) according to the nature of the variable.  
18

19  
20 All of the analyses will be adjusted to intubation sequence (laryngoscopy or  
21  
22 fibroscopy).  
23

24  
25 A predefined statistical analysis plan will be followed using SAS software V.9.3 (Cary,  
26  
27 North Carolina, USA). The statistical analysis will incorporate all of the elements required by  
28  
29 the CONSORT statement for non-pharmacological interventions.  
30

### 31 32 **Track record**

33  
34  
35 Data will be recorded in a web-based electronic case report form (eCRF) by the research  
36  
37 team. Characteristics at baseline will be gathered: age, sex, weight, height, medical history,  
38  
39 indication for surgery, predictive criteria of difficult FMV DI, description of the ETI procedure  
40  
41 (technical aspect, drugs and adverse events). During surgery, respiratory and cardiovascular  
42  
43 parameters will be assessed.  
44  
45

46  
47 Any protocol deviations will be recorded in the eCRF and the medical records. To  
48  
49 preserve the confidentiality of personal information, data will be key-coded using  
50  
51 alphanumeric numbers. To minimise missing data, to improve the quality of data collection  
52  
53  
54  
55  
56  
57  
58  
59

1  
2  
3 and tracking, an external assessor will collect the variation of SpO<sub>2</sub> by video recording of the  
4  
5 cardiorespiratory monitors during ETI procedure.  
6  
7  
8  
9

### 10 **Data statement**

11  
12  
13 Data set will be available on reasonable request to the corresponding author.  
14  
15

### 16 **Monitoring**

17  
18  
19 Monitoring will follow "Good Clinical Practice principles" and will be performed by the  
20  
21 independent promotion department of Nantes University Hospital Research Management  
22  
23  
24  
25  
26 Unit.  
27

28  
29 The following data will be assessed:  
30

- 31 - Written consent after oral and written information during the anaesthesia  
32  
33 consultation.
  - 34 - Flow chart filled in for included and excluded patients.
  - 35 - Trial progress.
  - 36 - Primary and secondary outcome collection.
  - 37 - Treatment-related severe adverse events.
- 38  
39  
40  
41  
42  
43  
44  
45

46 The eCRF is a secure, interactive, web-response system provided and managed by the  
47  
48 biometrics unit of the Nantes University Hospital (Nantes, France). The physicians and a  
49  
50 clinical research nurse will ensure compliance with the study protocol and collect the study  
51  
52 data in the eCRFs.  
53

### 54 **Trial status**

1  
2  
3 A total of 186 patients are expected to be included within 15 months.  
4

5 June 2018: protocol approval by the Ethics Committee.  
6  
7

8 September 2018: Start of inclusion.  
9

10 December 2019: End of inclusion.  
11  
12

13 We will submit the manuscript during the second half of 2020.  
14  
15

## 16 17 18 19 **ETHICS AND DISSEMINATION** 20

### 21 **Research ethics approval.** 22

23  
24 The trial will be conducted in compliance with the current version of the Declaration of  
25 Helsinki and Good Clinical Practice guidelines. The research project was approved by the  
26  
27 appropriate Ethical Review Board (Medical Ethic Committee “PARIS, Ile-de-France 2”,  
28  
29 registration number: 2018-04-04 RIPH2).  
30  
31  
32

33  
34 The study was registered at <http://www.clinicaltrials.gov> with trial identification number:  
35  
36 NCT03604120.  
37  
38

### 39 **Confidentiality** 40

41  
42 The study data will be handled as requested by the French Data Protection Authority (CNIL,  
43  
44 Commission Nationale de l'Informatique et des Libertés). All original records will be kept on  
45  
46 file at the trial site for 15 years. The electronic trial database file will be anonymised and  
47  
48 kept on file for 15 years.  
49  
50

### 51 **Conflict of interests** 52 53 54 55 56 57 58 59 60

1  
2  
3 This study was supported by institutional funds and a grant from Fisher & Paykel Healthcare  
4 (FPH) that is inferior to 20% of the total budget. FPH did not participate in the study design  
5 and will not participate in data collection, analysis and interpretation, nor in the preparation,  
6 review approval and decision to submit the manuscript for publication.  
7  
8  
9  
10

### 11 **Dissemination plan**

12  
13  
14  
15 The study will be published in an international medical journal.  
16

### 17 **DISCUSSION**

18  
19  
20 Among the ETI related adverse events, hypoxaemia is a life-threatening issue and this  
21 complication is mainly encountered during difficult airway management. HFNC presents  
22 several theoretical advantages compared with the standard face mask, including the ability  
23 to deliver continuous oxygen flow to perform apnoeic oxygenation. Recent expert  
24 guidelines[9,21] have advised the use of such a device to prevent desaturation during DI.  
25  
26 However, its accuracy has never been evaluated in a large randomised study. Given the  
27 preliminary data, this device could improve patient safety. However, it must be evaluated  
28 before systematic implementation in the airway control algorithm.  
29  
30  
31  
32  
33  
34  
35  
36  
37  
38  
39  
40  
41  
42

### 43 **ACKNOWLEDGEMENTS**

44  
45 We are grateful to the entire medical staff, nurses and research staff of the Anaesthesia and  
46 Critical Care Departments of Nantes University Hospital. We thank Ludivine Perrier for  
47 administrative and logistic support and Coralie Ono dit Biot for creating the eCRF and Dr  
48 Anne Chiffolleau, MD for safety monitoring.  
49  
50  
51  
52  
53  
54  
55  
56  
57  
58  
59  
60

## REFERENCES

- 1 Lienhart A, Auroy Y, Péquignot F, *et al.* [Preliminary results from the SFAR-iNSERM inquiry on anaesthesia-related deaths in France: mortality rates have fallen ten-fold over the past two decades]. *Bull Acad Natl Med* 2004;**188**:1429–37–discussion1437–41.
- 2 Cook TM, Woodall N, Frerk C, *et al.* Major complications of airway management in the UK: results of the Fourth National Audit Project of the Royal College of Anaesthetists and the Difficult Airway Society. Part 1: anaesthesia. *Br J Anaesth* 2011;**106**:617–31. doi:10.1093/bja/aer058
- 3 Cheney FW, Posner KL, Lee LA, *et al.* Trends in anesthesia-related death and brain damage: A closed claims analysis. *Anesthesiology* 2006;**105**:1081–6.
- 4 Rose DK, Cohen MM. The airway: problems and predictions in 18,500 patients. *Can J Anaesth* 1994;**41**:372–83. doi:10.1007/BF03009858
- 5 Domino KB, Posner KL, Caplan RA, *et al.* Airway injury during anesthesia: a closed claims analysis. *Anesthesiology* 1999;**91**:1703–11.
- 6 Peterson GN, Domino KB, Caplan RA, *et al.* Management of the difficult airway: a closed claims analysis. *Anesthesiology* 2005;**103**:33–9.
- 7 Thorpe CM, Gauntlett IS. Arterial oxygen saturation during induction of anaesthesia. *Anaesthesia* 1990;**45**:1012–5.
- 8 Apfelbaum JL, Caplan RA, Connis RT, *et al.* Practice guidelines for management of the difficult airway: an updated report by the American Society of Anesthesiologists Task Force on Management of the Difficult Airway. *Anesthesiology*. 2013;**118**:251–70. doi:10.1097/ALN.0b013e31827773b2
- 9 Langeron O, Bourgain J-L, Francon D, *et al.* Intubation difficile et extubation en anesthésie chez l'adulte. *Anesthésie & Réanimation* 2017;**3**:552–71. doi:10.1016/j.anrea.2017.09.003
- 10 Workeneh SA, Gebregzi AH, Denu ZA. Magnitude and Predisposing Factors of Difficult Airway during Induction of General Anaesthesia. *Anesthesiol Res Pract* 2017;**2017**:1–6. doi:10.1155/2017/5836397
- 11 Langeron O, Bourgain J-L, Laccoureye O, *et al.* [Difficult airway algorithms and management: question 5. Société Française d'Anesthésie et de Réanimation]. 2008. 41–5. doi:10.1016/j.annfar.2007.10.025
- 12 Sztark F, Francon D, Combes X, *et al.* [Which anaesthesia techniques for difficult intubation? Particular situations: question 3. Société Française d'Anesthésie et de Réanimation]. 2008. 26–32. doi:10.1016/j.annfar.2007.10.024
- 13 Russotto V, Cortegiani A, Raineri SM, *et al.* Respiratory support techniques to avoid desaturation in critically ill patients requiring endotracheal intubation: A systematic review and meta-analysis. *J Crit Care* 2017;**41**:98–106. doi:10.1016/j.jcrc.2017.05.003

- 1  
2  
3 14 Mir F, Patel A, Iqbal R, *et al.* A randomised controlled trial comparing transnasal humidified rapid insufflation ventilatory exchange (THRIVE) pre-oxygenation with facemask pre-oxygenation in patients undergoing rapid sequence induction of anaesthesia. *Anaesthesia* 2017;**72**:439–43. doi:10.1111/anae.13799
- 4  
5  
6  
7  
8 15 Gustafsson I-M, Lodenius Å, Tunelli J, *et al.* Apnoeic oxygenation in adults under general anaesthesia using Transnasal Humidified Rapid-Insufflation Ventilatory Exchange (THRIVE) - a physiological study. *Br J Anaesth* 2017;**118**:610–7. doi:10.1093/bja/aex036
- 9  
10  
11  
12  
13 16 White LD, Melhuish TM, White LK, *et al.* Apnoeic oxygenation during intubation: a systematic review and meta-analysis. *Anaesth Intensive Care* 2017;**45**:21–7.
- 14  
15  
16 17 Vourc'h M, Asfar P, Volteau C, *et al.* High-flow nasal cannula oxygen during endotracheal intubation in hypoxemic patients: a randomized controlled clinical trial. *Intensive Care Med* 2015;**41**:1538–48. doi:10.1007/s00134-015-3796-z
- 17  
18  
19  
20 18 Miguel-Montanes R, Hajage D, Messika J, *et al.* Use of high-flow nasal cannula oxygen therapy to prevent desaturation during tracheal intubation of intensive care patients with mild-to-moderate hypoxemia. *Crit Care Med* 2015;**43**:574–83. doi:10.1097/CCM.0000000000000743
- 21  
22  
23  
24  
25 19 Patel A, Nouraei SAR. Transnasal Humidified Rapid-Insufflation Ventilatory Exchange (THRIVE): a physiological method of increasing apnoea time in patients with difficult airways. *Anaesthesia* 2015;**70**:323–9. doi:10.1111/anae.12923
- 26  
27  
28  
29  
30 20 Badiger S, John M, Fearnley RA, *et al.* Optimizing oxygenation and intubation conditions during awake fibre-optic intubation using a high-flow nasal oxygen-delivery system. *Br J Anaesth* 2015;**115**:629–32. doi:10.1093/bja/aev262
- 31  
32  
33  
34 21 Frerk C, Mitchell VS, McNarry AF, *et al.* Difficult Airway Society 2015 guidelines for management of unanticipated difficult intubation in adults † †This Article is accompanied by Editorials aev298 and aev404. *Br J Anaesth* 2015;**115**:827–48. doi:10.1093/bja/aev371
- 35  
36  
37  
38  
39 22 Apfelbaum JL, Hagberg CA, Caplan RA, *et al.* Practice guidelines for management of the difficult airway: an updated report by the American Society of Anesthesiologists Task Force on Management of the Difficult Airway. *Anesthesiology*. 2013;**118**:251–70. doi:10.1097/ALN.0b013e31827773b2
- 40  
41  
42  
43  
44 23 Roth D, Pace NL, Lee A, *et al.* Airway physical examination tests for detection of difficult airway management in apparently normal adult patients. *Cochrane Database Syst Rev* 2018;**5**:CD008874. doi:10.1002/14651858.CD008874.pub2
- 45  
46  
47  
48  
49 24 Lundstrøm LH, Møller AM, Rosenstock C, *et al.* A documented previous difficult tracheal intubation as a prognostic test for a subsequent difficult tracheal intubation in adults. *Anaesthesia* 2009;**64**:1081–8. doi:10.1111/j.1365-2044.2009.06057.x
- 50  
51  
52  
53  
54 25 Driver BE, Prekker ME, Klein LR, *et al.* Effect of Use of a Bougie vs Endotracheal Tube and Stylet on First-Attempt Intubation Success Among

1  
2  
3 Patients With Difficult Airways Undergoing Emergency Intubation: A Randomized  
4 Clinical Trial. *JAMA* 2018;**319**:2179–89. doi:10.1001/jama.2018.6496

5  
6 26 Friede T, Kieser M. Sample size recalculation for binary data in internal pilot  
7 study designs. *Pharmaceutical Statistics* 2004;**3**:269–79. doi:10.1002/pst.140

8  
9 27 Friede T, Kieser M. Sample size recalculation in internal pilot study designs: a  
10 review. *Biom J* 2006;**48**:537–55.

#### 11 12 13 14 **AUTHORS CONTRIBUTION**

15  
16 KA and MV obtained funding. KA, SJ, DH, GB, AG, MS, MT, CG and MV designed the study. FF  
17  
18 and AC planned the statistical analysis. KA and MV will have full access to the final trial  
19  
20 dataset. All authors participated in the writing the manuscript and approved the final  
21  
22 version.  
23

#### 24 25 26 **FUNDING**

27  
28  
29  
30 The PREOPTIDAM trial is supported by the University Hospital of Nantes and a grant from  
31  
32 Fisher & Paykel Healthcare (FPH) that is inferior to 20% of the total budget. The sponsor had  
33  
34 no role in the trial design, trial conduct, data handling, data analysis or writing and  
35  
36 publication of the manuscript.  
37

#### 38 39 40 **DISCLAIMER**

41  
42  
43 The funding sources had no role in the trial design, trial conduct, data handling, data analysis  
44  
45 or writing and publication of the manuscript.  
46  
47

#### 48 49 **COMPETING INTERESTS**



1  
2  
3 MV reports personal fees from MSD, Pfizer, Baxter, grants from Fischer Paykel, outside the  
4  
5 submitted work. SJ reports personal fees from Draeger, Fresenius-Xenios and Fisher Paykel  
6  
7 Healthcare, outside the submitted work. No other disclosures are reported.  
8  
9  
10  
11  
12  
13  
14  
15  
16  
17  
18  
19  
20

#### 21 **PATIENT CONSENT**

22  
23  
24 Oral and written consent required.  
25  
26

#### 27 **ETHICS APPROVAL**

28  
29  
30  
31 By 11 june 2018 the study had been approved by a central ethics committee (Comité de  
32  
33 Protection des Personnes Ile-de-France II, Paris, France), reference: 2018-04-04 RIPH2  
34  
35  
36  
37  
38  
39  
40  
41  
42  
43  
44  
45  
46  
47  
48  
49  
50  
51  
52  
53  
54  
55  
56  
57  
58  
59  
60

1  
2  
3 **Tables and Figures**  
4  
5

6 **Title Table 1:** Participants timeline  
7

8  
9 **Legends Table 1:** After written informed consent, the patient will be randomized and  
10  
11 preoxygenation will be performed accordingly. Patients will be followed until the Post-  
12  
13 Anesthesia Care Unit (PACU) discharge.  
14  
15

16  
17  
18  
19 **Title Figure 1:** Study design  
20  
21

22  
23 **Legend Figure 1:** After attending physician decision to perform laryngoscopic or fiber-optic  
24  
25 intubation, patients will be randomized to receive HFNC or Face mask oxygenation. **FOI:**  
26  
27 Fiber-Optic Intubation, **ETI:** Endo-Tracheal Intubation, **HFNC:** High Flow Nasal Cannula, **FiO2:**  
28  
29 Fraction of inspired oxygen  
30  
31  
32  
33  
34  
35  
36  
37  
38  
39  
40  
41  
42  
43  
44  
45  
46  
47  
48  
49  
50  
51  
52  
53  
54  
55  
56  
57  
58  
59  
60

1  
2  
3  
4  
5  
6  
7  
8  
9  
10  
11  
12  
13  
14  
15  
16  
17  
18  
19  
20  
21  
22  
23  
24  
25  
26  
27  
28  
29  
30  
31  
32  
33  
34  
35  
36  
37  
38  
39  
40  
41  
42  
43  
44  
45  
46  
47  
48  
49  
50  
51  
52  
53  
54  
55  
56  
57  
58  
59  
60

**Figure 1: Study intervention**

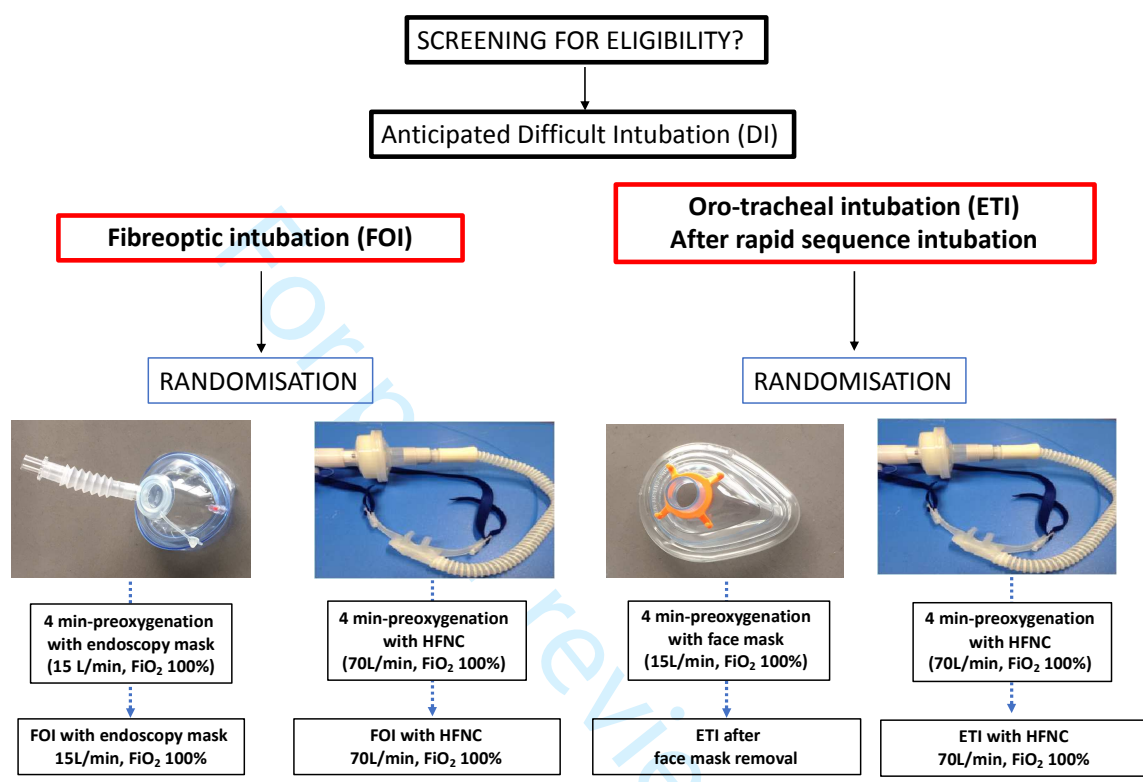

**Table 1: Participant timeline**

|                     | Anaesthesia consultation | Pre-operative consultation | Inclusion | Intubation & surgery | PACU | PACU discharge |
|---------------------|--------------------------|----------------------------|-----------|----------------------|------|----------------|
| Eligibility?        | X                        | X                          |           |                      |      |                |
| Information         | X                        | X                          |           |                      |      |                |
| Written consent     |                          | X                          |           |                      |      |                |
| Randomisation       |                          |                            | X         |                      |      |                |
| Data collection     |                          |                            |           | X                    | X    |                |
| Exit from the study |                          |                            |           |                      |      | X              |

# Reporting checklist for protocol of a clinical trial.

Based on the SPIRIT guidelines.

## Instructions to authors

Complete this checklist by entering the page numbers from your manuscript where readers will find each of the items listed below.

Your article may not currently address all the items on the checklist. Please modify your text to include the missing information. If you are certain that an item does not apply, please write "n/a" and provide a short explanation.

Upload your completed checklist as an extra file when you submit to a journal.

In your methods section, say that you used the SPIRIT reporting guidelines, and cite them as:

Chan A-W, Tetzlaff JM, Altman DG, Laupacis A, Gøtzsche PC, Krleža-Jerić K, Hróbjartsson A, Mann H, Dickersin K, Berlin J, Doré C, Parulekar W, Summerskill W, Groves T, Schulz K, Sox H, Rockhold FW, Rennie D, Moher D. SPIRIT 2013 Statement: Defining standard protocol items for clinical trials. *Ann Intern Med.* 2013;158(3):200-207

|                                             |     | Reporting Item                                                                                               | Page Number |
|---------------------------------------------|-----|--------------------------------------------------------------------------------------------------------------|-------------|
| Title                                       | #1  | Descriptive title identifying the study design, population, interventions, and, if applicable, trial acronym | 1           |
| Trial registration                          | #2a | Trial identifier and registry name. If not yet registered, name of intended registry                         | 3           |
| Trial registration: data set                | #2b | All items from the World Health Organization Trial Registration Data Set                                     | NA          |
| Protocol version                            | #3  | Date and version identifier                                                                                  | 3           |
| Funding                                     | #4  | Sources and types of financial, material, and other support                                                  | 22          |
| Roles and responsibilities: contributorship | #5a | Names, affiliations, and roles of protocol contributors                                                      | 1+22        |
| Roles and responsibilities:                 | #5b | Name and contact information for the trial sponsor                                                           | 1           |

|    |                      |      |                                                              |       |
|----|----------------------|------|--------------------------------------------------------------|-------|
| 1  | sponsor contact      |      |                                                              |       |
| 2  | information          |      |                                                              |       |
| 3  |                      |      |                                                              |       |
| 4  | Roles and            | #5c  | Role of study sponsor and funders, if any, in study design;  | 22    |
| 5  | responsibilities:    |      | collection, management, analysis, and interpretation of      |       |
| 6  | sponsor and funder   |      | data; writing of the report; and the decision to submit the  |       |
| 7  |                      |      | report for publication, including whether they will have     |       |
| 8  |                      |      | ultimate authority over any of these activities              |       |
| 9  |                      |      |                                                              |       |
| 10 |                      |      |                                                              |       |
| 11 |                      |      |                                                              |       |
| 12 | Roles and            | #5d  | Composition, roles, and responsibilities of the coordinating | 17+22 |
| 13 | responsibilities:    |      | centre, steering committee, endpoint adjudication            |       |
| 14 | committees           |      | committee, data management team, and other individuals       |       |
| 15 |                      |      | or groups overseeing the trial, if applicable (see Item 21a  |       |
| 16 |                      |      | for data monitoring committee)                               |       |
| 17 |                      |      |                                                              |       |
| 18 |                      |      |                                                              |       |
| 19 |                      |      |                                                              |       |
| 20 | Background and       | #6a  | Description of research question and justification for       | 5+6   |
| 21 | rationale            |      | undertaking the trial, including summary of relevant         |       |
| 22 |                      |      | studies (published and unpublished) examining benefits       |       |
| 23 |                      |      | and harms for each intervention                              |       |
| 24 |                      |      |                                                              |       |
| 25 |                      |      |                                                              |       |
| 26 |                      |      |                                                              |       |
| 27 | Background and       | #6b  | Explanation for choice of comparators                        | 5     |
| 28 | rationale: choice of |      |                                                              |       |
| 29 | comparators          |      |                                                              |       |
| 30 |                      |      |                                                              |       |
| 31 |                      |      |                                                              |       |
| 32 | Objectives           | #7   | Specific objectives or hypotheses                            | 6-7   |
| 33 |                      |      |                                                              |       |
| 34 |                      |      |                                                              |       |
| 35 | Trial design         | #8   | Description of trial design including type of trial (eg,     | 7     |
| 36 |                      |      | parallel group, crossover, factorial, single group),         |       |
| 37 |                      |      | allocation ratio, and framework (eg, superiority,            |       |
| 38 |                      |      | equivalence, non-inferiority, exploratory)                   |       |
| 39 |                      |      |                                                              |       |
| 40 |                      |      |                                                              |       |
| 41 |                      |      |                                                              |       |
| 42 | Study setting        | #9   | Description of study settings (eg, community clinic,         | 7     |
| 43 |                      |      | academic hospital) and list of countries where data will be  |       |
| 44 |                      |      | collected. Reference to where list of study sites can be     |       |
| 45 |                      |      | obtained                                                     |       |
| 46 |                      |      |                                                              |       |
| 47 |                      |      |                                                              |       |
| 48 | Eligibility criteria | #10  | Inclusion and exclusion criteria for participants. If        | 8-9   |
| 49 |                      |      | applicable, eligibility criteria for study centres and       |       |
| 50 |                      |      | individuals who will perform the interventions (eg,          |       |
| 51 |                      |      | surgeons, psychotherapists)                                  |       |
| 52 |                      |      |                                                              |       |
| 53 |                      |      |                                                              |       |
| 54 |                      |      |                                                              |       |
| 55 | Interventions:       | #11a | Interventions for each group with sufficient detail to allow | 10    |
| 56 | description          |      | replication, including how and when they will be             |       |
| 57 |                      |      | administered                                                 |       |
| 58 |                      |      |                                                              |       |
| 59 |                      |      |                                                              |       |
| 60 |                      |      |                                                              |       |

|    |                      |      |                                                             |          |
|----|----------------------|------|-------------------------------------------------------------|----------|
| 1  | Interventions:       | #11b | Criteria for discontinuing or modifying allocated           | 11       |
| 2  | modifications        |      | interventions for a given trial participant (eg, drug dose  |          |
| 3  |                      |      | change in response to harms, participant request, or        |          |
| 4  |                      |      | improving / worsening disease)                              |          |
| 5  |                      |      |                                                             |          |
| 6  |                      |      |                                                             |          |
| 7  |                      |      |                                                             |          |
| 8  | Interventions:       | #11c | Strategies to improve adherence to intervention protocols,  | NA       |
| 9  | adherence            |      | and any procedures for monitoring adherence (eg, drug       |          |
| 10 |                      |      | tablet return; laboratory tests)                            |          |
| 11 |                      |      |                                                             |          |
| 12 |                      |      |                                                             |          |
| 13 | Interventions:       | #11d | Relevant concomitant care and interventions that are        | 10       |
| 14 | concomitant care     |      | permitted or prohibited during the trial                    |          |
| 15 |                      |      |                                                             |          |
| 16 |                      |      |                                                             |          |
| 17 | Outcomes             | #12  | Primary, secondary, and other outcomes, including the       | 12+13+14 |
| 18 |                      |      | specific measurement variable (eg, systolic blood           |          |
| 19 |                      |      | pressure), analysis metric (eg, change from baseline, final |          |
| 20 |                      |      | value, time to event), method of aggregation (eg, median,   |          |
| 21 |                      |      | proportion), and time point for each outcome. Explanation   |          |
| 22 |                      |      | of the clinical relevance of chosen efficacy and harm       |          |
| 23 |                      |      | outcomes is strongly recommended                            |          |
| 24 |                      |      |                                                             |          |
| 25 |                      |      |                                                             |          |
| 26 |                      |      |                                                             |          |
| 27 |                      |      |                                                             |          |
| 28 | Participant timeline | #13  | Time schedule of enrolment, interventions (including any    | 11       |
| 29 |                      |      | run-ins and washouts), assessments, and visits for          |          |
| 30 |                      |      | participants. A schematic diagram is highly recommended     |          |
| 31 |                      |      | (see Figure)                                                |          |
| 32 |                      |      |                                                             |          |
| 33 |                      |      |                                                             |          |
| 34 |                      |      |                                                             |          |
| 35 | Sample size          | #14  | Estimated number of participants needed to achieve study    | 15       |
| 36 |                      |      | objectives and how it was determined, including clinical    |          |
| 37 |                      |      | and statistical assumptions supporting any sample size      |          |
| 38 |                      |      | calculations                                                |          |
| 39 |                      |      |                                                             |          |
| 40 |                      |      |                                                             |          |
| 41 |                      |      |                                                             |          |
| 42 | Recruitment          | #15  | Strategies for achieving adequate participant enrolment to  | 8+10     |
| 43 |                      |      | reach target sample size                                    |          |
| 44 |                      |      |                                                             |          |
| 45 |                      |      |                                                             |          |
| 46 | Allocation: sequence | #16a | Method of generating the allocation sequence (eg,           | 9        |
| 47 | generation           |      | computer-generated random numbers), and list of any         |          |
| 48 |                      |      | factors for stratification. To reduce predictability of a   |          |
| 49 |                      |      | random sequence, details of any planned restriction (eg,    |          |
| 50 |                      |      | blocking) should be provided in a separate document that    |          |
| 51 |                      |      | is unavailable to those who enrol participants or assign    |          |
| 52 |                      |      | interventions                                               |          |
| 53 |                      |      |                                                             |          |
| 54 |                      |      |                                                             |          |
| 55 |                      |      |                                                             |          |
| 56 |                      |      |                                                             |          |
| 57 | Allocation           | #16b | Mechanism of implementing the allocation sequence (eg,      | 9        |
| 58 | concealment          |      | central telephone; sequentially numbered, opaque, sealed    |          |
| 59 |                      |      |                                                             |          |
| 60 |                      |      |                                                             |          |

|    |                        |      |                                                                                                                                                                                                                                                                                                                                                                                                              |       |
|----|------------------------|------|--------------------------------------------------------------------------------------------------------------------------------------------------------------------------------------------------------------------------------------------------------------------------------------------------------------------------------------------------------------------------------------------------------------|-------|
| 1  | mechanism              |      | envelopes), describing any steps to conceal the sequence until interventions are assigned                                                                                                                                                                                                                                                                                                                    |       |
| 2  |                        |      |                                                                                                                                                                                                                                                                                                                                                                                                              |       |
| 3  |                        |      |                                                                                                                                                                                                                                                                                                                                                                                                              |       |
| 4  | Allocation:            | #16c | Who will generate the allocation sequence, who will enrol participants, and who will assign participants to interventions                                                                                                                                                                                                                                                                                    | 7+8+9 |
| 5  | implementation         |      |                                                                                                                                                                                                                                                                                                                                                                                                              |       |
| 6  |                        |      |                                                                                                                                                                                                                                                                                                                                                                                                              |       |
| 7  |                        |      |                                                                                                                                                                                                                                                                                                                                                                                                              |       |
| 8  |                        |      |                                                                                                                                                                                                                                                                                                                                                                                                              |       |
| 9  | Blinding (masking)     | #17a | Who will be blinded after assignment to interventions (eg, trial participants, care providers, outcome assessors, data analysts), and how                                                                                                                                                                                                                                                                    | 10    |
| 10 |                        |      |                                                                                                                                                                                                                                                                                                                                                                                                              |       |
| 11 |                        |      |                                                                                                                                                                                                                                                                                                                                                                                                              |       |
| 12 |                        |      |                                                                                                                                                                                                                                                                                                                                                                                                              |       |
| 13 |                        |      |                                                                                                                                                                                                                                                                                                                                                                                                              |       |
| 14 | Blinding (masking):    | #17b | If blinded, circumstances under which unblinding is permissible, and procedure for revealing a participant's allocated intervention during the trial                                                                                                                                                                                                                                                         | NA    |
| 15 | emergency              |      |                                                                                                                                                                                                                                                                                                                                                                                                              |       |
| 16 | unblinding             |      |                                                                                                                                                                                                                                                                                                                                                                                                              |       |
| 17 |                        |      |                                                                                                                                                                                                                                                                                                                                                                                                              |       |
| 18 |                        |      |                                                                                                                                                                                                                                                                                                                                                                                                              |       |
| 19 |                        |      |                                                                                                                                                                                                                                                                                                                                                                                                              |       |
| 20 | Data collection plan   | #18a | Plans for assessment and collection of outcome, baseline, and other trial data, including any related processes to promote data quality (eg, duplicate measurements, training of assessors) and a description of study instruments (eg, questionnaires, laboratory tests) along with their reliability and validity, if known. Reference to where data collection forms can be found, if not in the protocol | 16    |
| 21 |                        |      |                                                                                                                                                                                                                                                                                                                                                                                                              |       |
| 22 |                        |      |                                                                                                                                                                                                                                                                                                                                                                                                              |       |
| 23 |                        |      |                                                                                                                                                                                                                                                                                                                                                                                                              |       |
| 24 |                        |      |                                                                                                                                                                                                                                                                                                                                                                                                              |       |
| 25 |                        |      |                                                                                                                                                                                                                                                                                                                                                                                                              |       |
| 26 |                        |      |                                                                                                                                                                                                                                                                                                                                                                                                              |       |
| 27 |                        |      |                                                                                                                                                                                                                                                                                                                                                                                                              |       |
| 28 |                        |      |                                                                                                                                                                                                                                                                                                                                                                                                              |       |
| 29 |                        |      |                                                                                                                                                                                                                                                                                                                                                                                                              |       |
| 30 |                        |      |                                                                                                                                                                                                                                                                                                                                                                                                              |       |
| 31 |                        |      |                                                                                                                                                                                                                                                                                                                                                                                                              |       |
| 32 |                        |      |                                                                                                                                                                                                                                                                                                                                                                                                              |       |
| 33 | Data collection plan:  | #18b | Plans to promote participant retention and complete follow-up, including list of any outcome data to be collected for participants who discontinue or deviate from intervention protocols                                                                                                                                                                                                                    | 16    |
| 34 | retention              |      |                                                                                                                                                                                                                                                                                                                                                                                                              |       |
| 35 |                        |      |                                                                                                                                                                                                                                                                                                                                                                                                              |       |
| 36 |                        |      |                                                                                                                                                                                                                                                                                                                                                                                                              |       |
| 37 |                        |      |                                                                                                                                                                                                                                                                                                                                                                                                              |       |
| 38 |                        |      |                                                                                                                                                                                                                                                                                                                                                                                                              |       |
| 39 |                        |      |                                                                                                                                                                                                                                                                                                                                                                                                              |       |
| 40 | Data management        | #19  | Plans for data entry, coding, security, and storage, including any related processes to promote data quality (eg, double data entry; range checks for data values). Reference to where details of data management procedures can be found, if not in the protocol                                                                                                                                            | 16+18 |
| 41 |                        |      |                                                                                                                                                                                                                                                                                                                                                                                                              |       |
| 42 |                        |      |                                                                                                                                                                                                                                                                                                                                                                                                              |       |
| 43 |                        |      |                                                                                                                                                                                                                                                                                                                                                                                                              |       |
| 44 |                        |      |                                                                                                                                                                                                                                                                                                                                                                                                              |       |
| 45 |                        |      |                                                                                                                                                                                                                                                                                                                                                                                                              |       |
| 46 |                        |      |                                                                                                                                                                                                                                                                                                                                                                                                              |       |
| 47 |                        |      |                                                                                                                                                                                                                                                                                                                                                                                                              |       |
| 48 | Statistics: outcomes   | #20a | Statistical methods for analysing primary and secondary outcomes. Reference to where other details of the statistical analysis plan can be found, if not in the protocol                                                                                                                                                                                                                                     | 15+16 |
| 49 |                        |      |                                                                                                                                                                                                                                                                                                                                                                                                              |       |
| 50 |                        |      |                                                                                                                                                                                                                                                                                                                                                                                                              |       |
| 51 |                        |      |                                                                                                                                                                                                                                                                                                                                                                                                              |       |
| 52 |                        |      |                                                                                                                                                                                                                                                                                                                                                                                                              |       |
| 53 | Statistics: additional | #20b | Methods for any additional analyses (eg, subgroup and adjusted analyses)                                                                                                                                                                                                                                                                                                                                     | 15+16 |
| 54 | analyses               |      |                                                                                                                                                                                                                                                                                                                                                                                                              |       |
| 55 |                        |      |                                                                                                                                                                                                                                                                                                                                                                                                              |       |
| 56 |                        |      |                                                                                                                                                                                                                                                                                                                                                                                                              |       |
| 57 | Statistics: analysis   | #20c | Definition of analysis population relating to protocol non-adherence (eg, as randomised analysis), and any                                                                                                                                                                                                                                                                                                   | 15    |
| 58 | population and         |      |                                                                                                                                                                                                                                                                                                                                                                                                              |       |
| 59 |                        |      |                                                                                                                                                                                                                                                                                                                                                                                                              |       |
| 60 |                        |      |                                                                                                                                                                                                                                                                                                                                                                                                              |       |



|    |                                         |      |                                                                                                                                                                                                                                                                                                                                       |          |
|----|-----------------------------------------|------|---------------------------------------------------------------------------------------------------------------------------------------------------------------------------------------------------------------------------------------------------------------------------------------------------------------------------------------|----------|
| 1  | missing data                            |      | statistical methods to handle missing data (eg, multiple imputation)                                                                                                                                                                                                                                                                  |          |
| 2  |                                         |      |                                                                                                                                                                                                                                                                                                                                       |          |
| 3  |                                         |      |                                                                                                                                                                                                                                                                                                                                       |          |
| 4  | Data monitoring:<br>formal committee    | #21a | Composition of data monitoring committee (DMC); summary of its role and reporting structure; statement of whether it is independent from the sponsor and competing interests; and reference to where further details about its charter can be found, if not in the protocol. Alternatively, an explanation of why a DMC is not needed | 17       |
| 5  |                                         |      |                                                                                                                                                                                                                                                                                                                                       |          |
| 6  |                                         |      |                                                                                                                                                                                                                                                                                                                                       |          |
| 7  |                                         |      |                                                                                                                                                                                                                                                                                                                                       |          |
| 8  |                                         |      |                                                                                                                                                                                                                                                                                                                                       |          |
| 9  |                                         |      |                                                                                                                                                                                                                                                                                                                                       |          |
| 10 |                                         |      |                                                                                                                                                                                                                                                                                                                                       |          |
| 11 |                                         |      |                                                                                                                                                                                                                                                                                                                                       |          |
| 12 |                                         |      |                                                                                                                                                                                                                                                                                                                                       |          |
| 13 |                                         |      |                                                                                                                                                                                                                                                                                                                                       |          |
| 14 | Data monitoring:<br>interim analysis    | #21b | Description of any interim analyses and stopping guidelines, including who will have access to these interim results and make the final decision to terminate the trial                                                                                                                                                               | 15       |
| 15 |                                         |      |                                                                                                                                                                                                                                                                                                                                       |          |
| 16 |                                         |      |                                                                                                                                                                                                                                                                                                                                       |          |
| 17 |                                         |      |                                                                                                                                                                                                                                                                                                                                       |          |
| 18 |                                         |      |                                                                                                                                                                                                                                                                                                                                       |          |
| 19 | Harms                                   | #22  | Plans for collecting, assessing, reporting, and managing solicited and spontaneously reported adverse events and other unintended effects of trial interventions or trial conduct                                                                                                                                                     | 14+15+16 |
| 20 |                                         |      |                                                                                                                                                                                                                                                                                                                                       |          |
| 21 |                                         |      |                                                                                                                                                                                                                                                                                                                                       |          |
| 22 |                                         |      |                                                                                                                                                                                                                                                                                                                                       |          |
| 23 |                                         |      |                                                                                                                                                                                                                                                                                                                                       |          |
| 24 |                                         |      |                                                                                                                                                                                                                                                                                                                                       |          |
| 25 |                                         |      |                                                                                                                                                                                                                                                                                                                                       |          |
| 26 | Auditing                                | #23  | Frequency and procedures for auditing trial conduct, if any, and whether the process will be independent from investigators and the sponsor                                                                                                                                                                                           | 17       |
| 27 |                                         |      |                                                                                                                                                                                                                                                                                                                                       |          |
| 28 |                                         |      |                                                                                                                                                                                                                                                                                                                                       |          |
| 29 |                                         |      |                                                                                                                                                                                                                                                                                                                                       |          |
| 30 |                                         |      |                                                                                                                                                                                                                                                                                                                                       |          |
| 31 | Research ethics<br>approval             | #24  | Plans for seeking research ethics committee / institutional review board (REC / IRB) approval                                                                                                                                                                                                                                         | 18       |
| 32 |                                         |      |                                                                                                                                                                                                                                                                                                                                       |          |
| 33 |                                         |      |                                                                                                                                                                                                                                                                                                                                       |          |
| 34 |                                         |      |                                                                                                                                                                                                                                                                                                                                       |          |
| 35 | Protocol<br>amendments                  | #25  | Plans for communicating important protocol modifications (eg, changes to eligibility criteria, outcomes, analyses) to relevant parties (eg, investigators, REC / IRBs, trial participants, trial registries, journals, regulators)                                                                                                    | NA       |
| 36 |                                         |      |                                                                                                                                                                                                                                                                                                                                       |          |
| 37 |                                         |      |                                                                                                                                                                                                                                                                                                                                       |          |
| 38 |                                         |      |                                                                                                                                                                                                                                                                                                                                       |          |
| 39 |                                         |      |                                                                                                                                                                                                                                                                                                                                       |          |
| 40 |                                         |      |                                                                                                                                                                                                                                                                                                                                       |          |
| 41 |                                         |      |                                                                                                                                                                                                                                                                                                                                       |          |
| 42 | Consent or assent                       | #26a | Who will obtain informed consent or assent from potential trial participants or authorised surrogates, and how (see Item 32)                                                                                                                                                                                                          | 8+10     |
| 43 |                                         |      |                                                                                                                                                                                                                                                                                                                                       |          |
| 44 |                                         |      |                                                                                                                                                                                                                                                                                                                                       |          |
| 45 |                                         |      |                                                                                                                                                                                                                                                                                                                                       |          |
| 46 |                                         |      |                                                                                                                                                                                                                                                                                                                                       |          |
| 47 | Consent or assent:<br>ancillary studies | #26b | Additional consent provisions for collection and use of participant data and biological specimens in ancillary studies, if applicable                                                                                                                                                                                                 | NA       |
| 48 |                                         |      |                                                                                                                                                                                                                                                                                                                                       |          |
| 49 |                                         |      |                                                                                                                                                                                                                                                                                                                                       |          |
| 50 |                                         |      |                                                                                                                                                                                                                                                                                                                                       |          |
| 51 |                                         |      |                                                                                                                                                                                                                                                                                                                                       |          |
| 52 | Confidentiality                         | #27  | How personal information about potential and enrolled participants will be collected, shared, and maintained in order to protect confidentiality before, during, and after the trial                                                                                                                                                  | 16+18    |
| 53 |                                         |      |                                                                                                                                                                                                                                                                                                                                       |          |
| 54 |                                         |      |                                                                                                                                                                                                                                                                                                                                       |          |
| 55 |                                         |      |                                                                                                                                                                                                                                                                                                                                       |          |
| 56 |                                         |      |                                                                                                                                                                                                                                                                                                                                       |          |
| 57 |                                         |      |                                                                                                                                                                                                                                                                                                                                       |          |
| 58 |                                         |      |                                                                                                                                                                                                                                                                                                                                       |          |
| 59 |                                         |      |                                                                                                                                                                                                                                                                                                                                       |          |
| 60 |                                         |      |                                                                                                                                                                                                                                                                                                                                       |          |

|    |                       |      |                                                                 |       |
|----|-----------------------|------|-----------------------------------------------------------------|-------|
| 1  | Declaration of        | #28  | Financial and other competing interests for principal           | 18+22 |
| 2  | interests             |      | investigators for the overall trial and each study site         |       |
| 3  |                       |      |                                                                 |       |
| 4  |                       |      |                                                                 |       |
| 5  | Data access           | #29  | Statement of who will have access to the final trial dataset,   | 16+22 |
| 6  |                       |      | and disclosure of contractual agreements that limit such        |       |
| 7  |                       |      | access for investigators                                        |       |
| 8  |                       |      |                                                                 |       |
| 9  |                       |      |                                                                 |       |
| 10 | Ancillary and post    | #30  | Provisions, if any, for ancillary and post-trial care, and for  | NA    |
| 11 | trial care            |      | compensation to those who suffer harm from trial                |       |
| 12 |                       |      | participation                                                   |       |
| 13 |                       |      |                                                                 |       |
| 14 |                       |      |                                                                 |       |
| 15 | Dissemination         | #31a | Plans for investigators and sponsor to communicate trial        | 18    |
| 16 | policy: trial results |      | results to participants, healthcare professionals, the          |       |
| 17 |                       |      | public, and other relevant groups (eg, via publication,         |       |
| 18 |                       |      | reporting in results databases, or other data sharing           |       |
| 19 |                       |      | arrangements), including any publication restrictions           |       |
| 20 |                       |      |                                                                 |       |
| 21 |                       |      |                                                                 |       |
| 22 |                       |      |                                                                 |       |
| 23 |                       |      |                                                                 |       |
| 24 | Dissemination         | #31b | Authorship eligibility guidelines and any intended use of       | NA    |
| 25 | policy: authorship    |      | professional writers                                            |       |
| 26 |                       |      |                                                                 |       |
| 27 |                       |      |                                                                 |       |
| 28 | Dissemination         | #31c | Plans, if any, for granting public access to the full protocol, | 16    |
| 29 | policy: reproducible  |      | participant-level dataset, and statistical code                 |       |
| 30 | research              |      |                                                                 |       |
| 31 |                       |      |                                                                 |       |
| 32 |                       |      |                                                                 |       |
| 33 | Informed consent      | #32  | Model consent form and other related documentation              | NA    |
| 34 | materials             |      | given to participants and authorised surrogates                 |       |
| 35 |                       |      |                                                                 |       |
| 36 |                       |      |                                                                 |       |
| 37 | Biological specimens  | #33  | Plans for collection, laboratory evaluation, and storage of     | NA    |
| 38 |                       |      | biological specimens for genetic or molecular analysis in       |       |
| 39 |                       |      | the current trial and for future use in ancillary studies, if   |       |
| 40 |                       |      | applicable                                                      |       |
| 41 |                       |      |                                                                 |       |
| 42 |                       |      |                                                                 |       |

43 The SPIRIT checklist is distributed under the terms of the Creative Commons Attribution License CC-  
 44 BY-ND 3.0. This checklist was completed on 02. August 2018 using <http://www.goodreports.org/>, a  
 45 tool made by the [EQUATOR Network](#) in collaboration with [Penelope.ai](#)  
 46  
 47  
 48  
 49  
 50  
 51  
 52  
 53  
 54  
 55  
 56  
 57  
 58  
 59  
 60

# BMJ Open

## Preoxygenation in difficult airway management: High-flow oxygenation by nasal cannula versus face mask (The PREOPTIDAM study): Protocol for a single-centre randomised study.

|                                 |                                                                                                                                                                                                                                                                                                                                                                                                                                                                                                                                                                                                                                                                                                                                                                                                                                                                                                                                                                                                                                                                                                                                                                                                                                                                                                                                                                                                                                                         |
|---------------------------------|---------------------------------------------------------------------------------------------------------------------------------------------------------------------------------------------------------------------------------------------------------------------------------------------------------------------------------------------------------------------------------------------------------------------------------------------------------------------------------------------------------------------------------------------------------------------------------------------------------------------------------------------------------------------------------------------------------------------------------------------------------------------------------------------------------------------------------------------------------------------------------------------------------------------------------------------------------------------------------------------------------------------------------------------------------------------------------------------------------------------------------------------------------------------------------------------------------------------------------------------------------------------------------------------------------------------------------------------------------------------------------------------------------------------------------------------------------|
| Journal:                        | <i>BMJ Open</i>                                                                                                                                                                                                                                                                                                                                                                                                                                                                                                                                                                                                                                                                                                                                                                                                                                                                                                                                                                                                                                                                                                                                                                                                                                                                                                                                                                                                                                         |
| Manuscript ID                   | bmjopen-2018-025909.R1                                                                                                                                                                                                                                                                                                                                                                                                                                                                                                                                                                                                                                                                                                                                                                                                                                                                                                                                                                                                                                                                                                                                                                                                                                                                                                                                                                                                                                  |
| Article Type:                   | Protocol                                                                                                                                                                                                                                                                                                                                                                                                                                                                                                                                                                                                                                                                                                                                                                                                                                                                                                                                                                                                                                                                                                                                                                                                                                                                                                                                                                                                                                                |
| Date Submitted by the Author:   | 25-Jan-2019                                                                                                                                                                                                                                                                                                                                                                                                                                                                                                                                                                                                                                                                                                                                                                                                                                                                                                                                                                                                                                                                                                                                                                                                                                                                                                                                                                                                                                             |
| Complete List of Authors:       | <p>VOURC'H, Mickael; Centre Hospitalier Universitaire de Nantes, Service d'Anesthésie-Réanimation; Centre Hospitalier Universitaire de Nantes, UPRES EA 3826, "Thérapeutiques Cliniques et Expérimentales des infections", IRS2 Nantes Biotech</p> <p>Huard, Donatien; Centre Hospitalier Universitaire de Nantes, Service d'Anesthésie-Réanimation</p> <p>FEUILLET, Fanny; Centre Hospitalier Universitaire de Nantes, Methodology and Biostatistics Platform, Research Promotion Department</p> <p>BAUD, Gabrielle; Centre Hospitalier Universitaire de Nantes, Service d'Anesthésie-Réanimation</p> <p>GUICHOUX, Arthur; Centre Hospitalier Universitaire de Nantes, Service d'Anesthésie-Réanimation</p> <p>SURBLED, Marielle; Centre Hospitalier Universitaire de Nantes, Service d'Anesthésie-Réanimation</p> <p>TISSOT, Melanie; Centre Hospitalier Universitaire de Nantes, Service d'Anesthésie-Réanimation</p> <p>CHIFFOLEAU, Anne; Centre Hospitalier Universitaire de Nantes, Unité de vigilance des essais cliniques,</p> <p>GUITTON, Christophe; Centre Hospitalier de Mans, Médecine intensive réanimation</p> <p>Jaber, S.; Montpellier Univ Hosp, Anesthesia and Critical Care</p> <p>Asehnoune, Karim; Centre Hospitalier Universitaire de Nantes, Service d'Anesthésie-Réanimation; Centre Hospitalier Universitaire de Nantes, UPRES EA 3826, "Thérapeutiques Cliniques et Expérimentales des infections", IRS2 Nantes Biotech,</p> |
| <b>Primary Subject Heading</b>: | Anaesthesia                                                                                                                                                                                                                                                                                                                                                                                                                                                                                                                                                                                                                                                                                                                                                                                                                                                                                                                                                                                                                                                                                                                                                                                                                                                                                                                                                                                                                                             |
| Secondary Subject Heading:      | Respiratory medicine, Anaesthesia                                                                                                                                                                                                                                                                                                                                                                                                                                                                                                                                                                                                                                                                                                                                                                                                                                                                                                                                                                                                                                                                                                                                                                                                                                                                                                                                                                                                                       |
| Keywords:                       | High-Flow Nasal Cannula, anticipated difficult intubation, fiberoptic intubation, video-laryngoscopy, Apneic oxygenation                                                                                                                                                                                                                                                                                                                                                                                                                                                                                                                                                                                                                                                                                                                                                                                                                                                                                                                                                                                                                                                                                                                                                                                                                                                                                                                                |
|                                 |                                                                                                                                                                                                                                                                                                                                                                                                                                                                                                                                                                                                                                                                                                                                                                                                                                                                                                                                                                                                                                                                                                                                                                                                                                                                                                                                                                                                                                                         |

1  
2  
3  
4  
5  
6  
7  
8  
9  
10  
11  
12  
13  
14  
15  
16  
17  
18  
19  
20  
21  
22  
23  
24  
25  
26  
27  
28  
29  
30  
31  
32  
33  
34  
35  
36  
37  
38  
39  
40  
41  
42  
43  
44  
45  
46  
47  
48  
49  
50  
51  
52  
53  
54  
55  
56  
57  
58  
59  
60

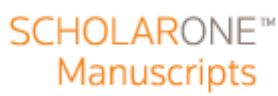

1  
2  
3 1 **TITLE PAGE**  
4  
5 2  
6

7 3 **Preoxygenation in difficult airway management: High-flow oxygenation by nasal cannula versus**  
8 **face mask (The PREOPTIDAM study): Protocol for a single-centre randomised study.**  
9  
10 4

11 5  
12  
13 6 Mickael Vourc'h,<sup>1,2</sup> Donatien Huard,<sup>1</sup> Fanny Feuillet,<sup>3</sup> Gabrielle Baud,<sup>1</sup> Arthur Guichoux,<sup>1</sup> Marielle  
14 7 Surbled,<sup>1</sup> Melanie Tissot,<sup>1</sup> Anne Chiffolleau,<sup>4</sup> Christophe Guitton,<sup>5</sup> Samir Jaber,<sup>6</sup> Karim Asehnoune<sup>1,2\*</sup>  
15  
16  
17  
18 8

19 9 Affiliations

20  
21  
22 10 1 Departments of Anaesthesiology and Surgical Intensive Care, Hôtel-Dieu, University Hospital of  
23 11 Nantes, 44093 Nantes, France

24  
25  
26  
27 12 2 UPRES EA 3826, "Thérapeutiques Cliniques et Expérimentales des infections", IRS2 Nantes Biotech,  
28 13 France

29  
30  
31  
32 14 3 Methodology and Biostatistics Platform, Research Promotion Department, University Hospital of  
33 15 Nantes, 44093 NANTES, FRANCE and UMR 1246 SPHERE "Methods for Patient-centered outcomes  
34 16 & Health Research, Nantes University, Tours University 44035 Nantes, France

35  
36  
37 17 4 Unité de vigilance des essais cliniques, Nantes University Hospital, Nantes, France

38  
39  
40 18 5 Intensive Care Unit, General Hospital Center, Le Mans, France

41  
42  
43  
44 19 6 Medical-Surgical Intensive Care Unit, University Hospital of Montpellier and INSERM U1046, 34295  
45 20 Montpellier, France

46  
47 21 \*Correspondence to Karim Asehnoune, MD, PhD, Department of Anaesthesiology and Surgical  
48 22 Intensive Care, Hôtel-Dieu, University Hospital of Nantes, 44093 Nantes, France,  
49 23 Karim.asehnoune@chu-nantes.fr, +33(0)253009182

50  
51  
52 24 **Word count: 3168**  
53  
54  
55  
56  
57  
58  
59 25  
60

## 1 ABSTRACT

2 **Introduction:** Although preoxygenation and airway management respond to precise algorithms,  
3 difficult intubation (DI) remains a daily challenge in Intensive Care Units (ICU) and in the operating  
4 rooms because of its frequent complications, including hypoxaemia. To prevent desaturation during DI,  
5 high-flow oxygenation by nasal cannula (HFNC) could prove beneficial. Indeed, contrary to standard  
6 preoxygenation device, it can be held in place throughout the intubation trying to perform apnoeic  
7 oxygenation during DI. Hence, recent guidelines recommend HFNC during DI, but its relevance has  
8 never been evaluated in this setting in a large randomised study until now.

9 **Methods and analysis:** The PREOPTIDAM trial is a prospective, single-centre, randomised, controlled  
10 study in Nantes University Hospital. In anticipated DI, we hypothesized that HFNC can decrease the  
11 incidence of desaturation  $\leq 94\%$  or face mask ventilation from 16 to 4% compared to standard device.  
12 Using a two-sided t-test with a first species risk of 5 % and 80 % power, a total of 186 patients will be  
13 included. Using a computer-generated randomization, with a 1:1 allocation ratio, patients will be  
14 randomised to HFNC or face mask pre-oxygenation. Randomisation will be stratified on intubation  
15 sequence: Rapid sequence intubation or awake fiberoptic intubation. The primary objective is to  
16 determine whether HFNC is more efficient than standard oxygenation techniques to prevent desaturation  
17  $\leq 94\%$  or face-mask ventilation during DI. Intent-to-treat and per-protocol analysis are planned for the  
18 primary outcome.

19 **Ethics and dissemination:** The study project has been approved by an independent ethics committee.  
20 Written informed consent will be obtained before study inclusion. Participant recruitment begins in  
21 september 2018. Results will be submitted to international peer-reviewed medical journals.

22  
23 **Trial registration number:** NCT03604120, registered in July 2018.

24 **Keywords:** High-Flow Nasal Cannula, anticipated difficult intubation, fiberoptic intubation, video-  
25 laryngoscopy, Apneic oxygenation

26

1  
2  
3 **1 Abbreviations:**  
4

5  
6 2 ASA: American Society of Anesthesiology  
7

8 3 DI: difficult Intubation  
9

10  
11 4 eCRF: electronic case report form  
12

13 5 FiO<sub>2</sub>: fraction of inspired oxygen  
14

15  
16 6 FOI: fiberoptic intubation  
17

18 7 HFNC: high flow nasal cannula  
19

20  
21 8 IDS: Intubation Difficulty Score  
22

23  
24 9 PACU: post-anaesthesia care unit  
25

26 10 RASS: Richmond agitation-sedation scale  
27

28  
29 11 RSI: Rapid sequence intubation  
30

31  
32 12 SFAR: French Society of Anesthesia and Intensive Care  
33

34  
35 13  
36

37 **14 Article Summary**  
38

39 **15 Strengths and limitations of this study:**  
40

- 41  
42 16 • PREOPTIDAM is the first prospective, randomised, controlled study evaluating high-flow  
43 oxygenation by nasal cannula as a preoxygenation and apneic oxygenation device during  
44 17 anticipated difficult intubation (DI) in order to prevent desaturation.  
45 18  
46  
47 19 • Broad inclusion criteria and large sample size will support external validity.  
48  
49 20 • Pragmatic study protocol reflects every day practice and results will be of high clinical  
50 21 relevance.  
51  
52 22 • As no data is available on the incidence of desaturation  $\leq 94\%$  during anticipated DI, an interim  
53 23 analysis will be carried out to allow re-estimating the sample size to maintain power.  
54  
55  
56  
57  
58  
59  
60

## 1 INTRODUCTION

2 Despite major safety improvement over the last decades, substantial morbidity and mortality remains in  
3 anaesthesia.[1] Hypoxaemia represented 20% of these severe adverse events.[2,3] Although airway  
4 management and preoxygenation sequence respond to precise algorithms, anticipated difficult  
5 intubation (DI) remains a daily challenge and a major cause of hypoxaemia during anaesthesia. [4,5]  
6 Preoxygenation, which consists in fulfilling functional residual capacity with pure oxygen, is the  
7 cornerstone of patient safety during intubation. Increasing oxygen reserve is the best way to extend safe  
8 apnoea duration and therefore to avoid hypoxaemia and its related complications. Current  
9 preoxygenation guidelines suggest performing 8 vital capacities or 3 minutes of spontaneous breathing  
10 with a standard face mask, at  $FiO_2 = 100\%$  in order to achieve  $EtO_2$  of  $> 90\%$ .[4,5] To reduce  
11 desaturation during anticipated DI, two options for airway management can be discussed: Rapid  
12 sequence intubation (RSI) or awake fiberoptic intubation (FOI).[4] RSI includes preoxygenation with a  
13 standard face mask, the administration of hypnotic and neuromuscular blocker with rapid onsets, and  
14 immediate intubation after mask removal without manual ventilation. RSI aims at 1) Minimizing the  
15 time from induction to intubation to reduce the risk of oxygen desaturation ;[5] 2) Ensuring a fast  
16 recovery of spontaneous breathing when intubation proves impossible with difficult face mask  
17 ventilation. FOI, usually performed under local anaesthesia and sedation, is proposed for anticipated  
18 "cannot ventilate" or "limited mouth-opening" patients. It preserves the patient's spontaneous breathing  
19 during intubation to avoid major hypoxaemia in case of difficult airway control. After preoxygenation,  
20 a dedicated face mask guarantees continuous oxygenation during the procedure. Whatever the option,  
21 and despite well-conducted preoxygenation, DI increases first-attempt failure, long-lasting procedure  
22 incidence, and leads to frequent oxygen desaturation.[6] According to the current guidelines, when the  
23 level of pulse oximetry ( $SpO_2$ ) drops below 95%, the operator has to interrupt intubation and focus on  
24 oxygenation (i.e. face mask ventilation).[7] Nevertheless, face mask ventilation could be difficult or  
25 impossible in patients with anticipated DI, and could give rise to gastric insufflation or active gag reflex  
26 and provoke vomiting or aspiration. It also often requires deepening anaesthesia, leading to severe



1  
2  
3 1 hypotension. As a result, to limit face mask ventilation during DI could also reduce adverse events,  
4  
5 2 driving research effort in this field.  
6  
7

8 3 High-flow oxygenation by nasal cannulae (HFNC) has been studied in the ICU and in the  
9  
10 4 operating room as a preoxygenation device, with controversial results.[8-10] Recent observational  
11  
12 5 studies have suggested the ability of HFNC to extend safe apnoea time during DI and to be held during  
13  
14 6 FOI.[11,12] This device can deliver up to 60 L/min with an inspired fraction of oxygen of up to  
15  
16 7 100%,[13] and generate a moderate positive supra-glottic end expiratory pressure.[14] HFNC could  
17  
18 8 prove beneficial for anticipated DI, during both the preoxygenation and the intubation:[15] After  
19  
20 9 preoxygenation for RSI, HFNC makes it possible to hold nasal prongs in place during laryngoscopy,  
21  
22 10 trying to perform apneic oxygenation throughout the intubation. During FOI, in a spontaneously  
23  
24 11 breathing patient, the preoxygenation and the oxygenation with standard device require a dedicated  
25  
26 12 operator to apply firmly the mask on the patient's face so as to ensure airtightness which is often poorly  
27  
28 13 tolerated. Moreover, in toothless patients or with a beard, significant leaks around the mask can alter  
29  
30 14 oxygenation. HFNC allows to insert the fiberscope in the patient's nostril to perform intubation while  
31  
32 15 continuing the oxygenation and may be better tolerated.  
33  
34  
35

36 16 Considering its theoretical advantages and recent recommendations,[5,7] HFNC must be assessed  
37  
38 17 during preoxygenation and apnoeic oxygenation during anticipated DI. Up to now, no large randomised  
39  
40 18 study has compared HFNC oxygenation with standard of care. Our objective will be to evaluate HFNC  
41  
42 19 preoxygenation for anticipated DI compared with face mask. We hypothesise that HFNC could reduce  
43  
44 20 oxygen desaturation during the intubation and the need of face mask ventilation accordingly.  
45  
46  
47  
48  
49  
50  
51  
52  
53  
54  
55  
56  
57  
58  
59  
60

## 1 **METHOD AND ANALYSIS**

### 2 **Objectives**

3 - Primary objective:

4 To compare the effectiveness of HFNC (interventional group) and face mask (standard method) as  
5 preoxygenation devices to prevent desaturation during anticipated DI.

6 - Secondary objectives:

7 To compare the quality of preoxygenation, intubation related complications, and patient's outcome until  
8 post-anaesthesia care unit (PACU) discharge between groups.

### 9 **Trial design**

10 The PREOPTIDAM trial will be a prospective, single-centre, open-label, randomised controlled study.  
11 The randomisation sequence will be computer-generated and stratified on the intubation method (RSI  
12 or FOI) according to the attending physician's decision. This study will adhere to the international  
13 recommendations for interventional trials.

### 14 **Study settings**

15 The study will take place at the Nantes University Hospital, France.

### 16 **Hypothesis**

17 We hypothesise that compared to face mask preoxygenation, HFNC could reduce the incidence of  
18 desaturation  $\leq 94\%$  or the necessity to use face mask ventilation for rescue oxygenation during  
19 anticipated DI.

### 21 **Participant eligibility and consent**

22 Trial site investigators will identify consecutive eligible patients from the listed criteria. Eligible patients  
23 will receive written and oral information. They will be included after investigators have obtained  
24 informed written consent.

1  
2  
3 1 - **Inclusion criteria**  
4

- 5 2 • Adults aged from 18 to 90 years  
6  
7 3 • 1 major or 2 minor criteria of anticipated DI (see below)  
8  
9 4 • And requiring a rapid sequence intubation (RSI) or requiring a fiberoptic intubation (FOI).  
10  
11

12 5 Anticipated DI criteria derived from international guidelines and recent publications:[4,16,17]  
13

- 14  
15 6 • 1 major criterion:  
16  
17 7 ➤ Past difficult intubation  
18  
19 8 ➤ Past laryngeal surgery or radiotherapy  
20  
21 9 ➤ Limited mouth opening < 25mm  
22  
23 10 ➤ Fixed flexion of the cervical spine  
24  
25 11 ➤ Mallampati IV  
26  
27 12 ➤ Tumour in the oral or laryngeal region  
28  
29

30 **OR**  
31

- 32  
33 14 • At least 2 minor criteria:  
34  
35 15 ➤ Bone to chin distance < 65mm  
36  
37 16 ➤ Limited mouth opening < 35 mm and > 25mm  
38  
39 17 ➤ Mallampati III  
40  
41 18 ➤ Limitation of cervical mobility  $\leq 35^\circ$   
42  
43 19 ➤ Neck perimeter > 40 cm for men and > 38 cm for women  
44  
45 20 ➤ Retrognathism  
46

47 21 - **Non-inclusion criteria**  
48

- 49 22 • BMI > 35 kg/m<sup>2</sup>  
50  
51 23 • Pulse oximetry < 90% in ambient air  
52  
53 24 • Haemodynamic instability  
54  
55 25 • Protected adult  
56  
57 26 • Pregnancy  
58  
59  
60

- 1
- 2
- 3 1 • Lack of consent
- 4
- 5 2 • Patient already enrolled in another randomised study to improve preoxygenation quality
- 6
- 7

### 8 3 **Assignment of interventions**

#### 10 4 - **Allocation**

13 5 Randomisation will be centralised, web-based and accessible 24 hours a day. The randomisation  
14 6 sequence will be carried out in blocks (1:1 ratio) and stratified according to intubation sequence (RSI or  
15 7 FOI).

#### 20 8 - **Sequence generation**

22 9 The randomisation sequence will be generated by a statistician working at the Clinical Research Unit of  
23 10 Nantes University Hospital and not involved in patient recruitment. The software used to collect the data  
24 11 in the eCRFs will automatically allocate patients, thereby ensuring concealment. The physicians and a  
25 12 clinical research nurse and/or clinical research assistant will screen the patients for eligibility.

#### 31 13 - **Blinding**

34 14 Blinding of the attending physician and patients to the type of preoxygenation device is not feasible.  
35 15 However, the primary outcome is assessed on the basis of an objective criterion.

### 41 17 **Trial intervention**

44 18 After written informed consent, the patients will be randomly assigned to (see **Figure 1: Study**  
45 19 **intervention**):

48 20 - The intervention group: HFNC preoxygenation for 4 minutes set at 60L/min of heated and  
49 21 humidified pure oxygen (fraction of inspired oxygen 100%, 37°C - Optiflow™; Fisher & Paykel  
50 22 Healthcare®, Auckland, New-Zealand). Large or medium nasal cannulae will be chosen according  
51 23 to the patient's nostril size to limit air contamination. Throughout the intubation procedure, HFNC  
52 24 will be maintained trying to achieve:

- 59 25 • Continuous oxygenation while the patient will be spontaneously breathing during FOI,

- Or apnoeic oxygenation during laryngoscopy for RSI

- The standard group: preoxygenation for 4 minutes with a face mask (which size will be adapted to fit the patient and ensure airtightness) connected to an Aisys CS<sup>2</sup> ventilation system (General Electric, GE Healthcare®, Oy, Finland). In this group, the ventilation system is set with 15 L/min of fresh gas, FiO<sub>2</sub> = 100%, without inspiratory support or expiratory positive pressure.

- For RSI, the face mask (Economy, Intersurgical®, Fontenay Sous Bois, France) will be removed after induction to enable intubation.

- For FOI the face mask (Fibroxy™, VBM, Sulz, Germany) will be kept in place throughout the intubation procedure with a 15L/min fresh gas flow, FiO<sub>2</sub> = 100%, ensuring airtightness.

In both groups, the first operator will be a senior or a junior supervised by a senior. All operators will have assisted a three half-day formation program so as to be familiar with this 3 oxygenation devices at the Nantes University Hospital simulation centre.

The current guidelines advise to interrupt intubation to focus on oxygenation (i.e. face mask ventilation) for oxygen desaturation  $\leq 94\%$ .<sup>[7]</sup> Nevertheless, the decision to proceed to face mask ventilation mainly depends on the progression of intubation procedure. Thus, mask ventilation is left at the discretion of the physician as well as the algorithm for rescue oxygenation. However, International recommendation will be presented to all of the investigators before the start of the study.<sup>[5]</sup> The attending physician will be free to withdraw the oxygenation device if it disrupts the intubation process or the rescue oxygenation. Clinical data will be collected throughout intubation, surgery, and until discharge of the PACU.

## **Concomitant medication/treatment**

1  
2  
3 1 The drugs for sedation and general anaesthesia induction as well as intubation devices will be left to the  
4  
5 2 discretion of the attending physician.  
6  
7  
8 3

9  
10 4 **Participant withdrawal**

11  
12  
13 5 Patients will be excluded from the trial if they withdraw their consent after randomisation. However, if  
14  
15 6 the patient does not object, the data already collected until consent withdrawal will be analysed. If the  
16  
17 7 patient refuses, the data will be deleted.  
18  
19  
20 8

21  
22 9 **Participant timeline and schedule**

23  
24  
25 10 Patients will be followed from the beginning of the preoxygenation until the Post-Anesthesia Care  
26  
27 11 Unit (PACU) discharge (see **Table 1**).  
28  
29

30 12 **Title Table 1:** Participants timeline

|                     | Anesthesia<br>consultation | Pre-operative<br>visit | Inclusion | Intubation<br>& surgery | PACU | PACU<br>discharge |
|---------------------|----------------------------|------------------------|-----------|-------------------------|------|-------------------|
| Eligibility?        | X                          | X                      |           |                         |      |                   |
| Information         | X                          | X                      |           |                         |      |                   |
| Written consent     |                            | X                      |           |                         |      |                   |
| Randomization       |                            |                        | X         |                         |      |                   |
| Data collection     |                            |                        |           | X                       | X    |                   |
| Exit from the study |                            |                        |           |                         |      | X                 |

31  
32  
33  
34  
35  
36  
37  
38  
39  
40  
41  
42  
43  
44  
45  
46  
47  
48  
49  
50 13  
51  
52 14 **Legends Table 1:** After written informed consent, the patient will be randomised and preoxygenation  
53  
54 15 will be performed according to the allocated device. Patients will be followed until the Post-  
55  
56 16 Anesthesia Care Unit (PACU) discharge.  
57  
58  
59 17  
60

## **Patient and Public Involvement**

Patients were not directly involved in the development of the research question or the design of the study. However, the primary and secondary outcomes of the study impact patients' safety and comfort. A written summary of the results of the study will be sent to requesting participants by mail. Participants satisfaction of the intervention will be assess before PACU discharge and will analysed as a secondary outcome.

## **Primary and secondary outcome**

### **1- Primary outcome**

Proportion of patients with desaturation  $\leq 94\%$  or need to use face mask ventilation for oxygen desaturation during intubation in each group.

#### *Measure of the primary outcome*

The patients will be classified in 2 groups: "No event" or "at least one event".

- For RSI, the primary criterion will be assessed from the induction of general anaesthesia to 2 minutes following intubation.
- For FOI, the primary criterion will be assessed from the beginning of sedation to 2 minutes following intubation.

Arterial oxygen saturation will be evaluated by level of oxygen saturation measured by pulse oximetry (SpO<sub>2</sub>). The evaluation period of SpO<sub>2</sub> will be extended to 2 minutes following intubation completion owing to possible delayed detection of desaturation with this device. Face mask ventilation will be noted if it occurs after general anaesthesia (RSI) or sedation (FOI) induction.

### **2- Secondary outcome**

- 1 - Preoxygenation quality:
  - 2 • SpO<sub>2</sub> at the beginning and at the end of the preoxygenation
  - 3 • Leaks during preoxygenation defined as:
    - 4 ➤ In the face mask group: Inward or backward leaks with at least 15% difference between
    - 5 inspired and expired volume.
    - 6 ➤ In the HFNC group: Leaks though the mouth for patients breathing with the mouth
    - 7 opened.
  - 8 • EtO<sub>2</sub> and EtCO<sub>2</sub> at the end the preoxygenation (face mask group only)
- 9 - Intubation procedure until the 2 following minutes:
  - 10 • Quality of exposure : Cormack-Lehane classification [18]
  - 11 • Intubation success
  - 12 • Number of laryngoscopy during RSI
  - 13 • Number of operators
  - 14 • Number of alternative devices
  - 15 • IDS score [19]
  - 16 • Difficult intubation rate [20]
  - 17 • Desaturation < 90%
  - 18 • Number of episode of face-mask ventilation
  - 19 • Length of intubation procedure - from general anaesthesia induction/start of sedation until the
  - 20 end of intubation -
  - 21 • Lowest SpO<sub>2</sub>
  - 22 • Lowest EtO<sub>2</sub> within 2 minutes following intubation
  - 23 • Highest EtCO<sub>2</sub> within 2 minutes following intubation



- 1 • Sedation quality during FOI assessed by the “patient sedation score” [21]
- 2 • Patient’s satisfaction score [22]
- 3 - Intubation related adverse events during intubation and the following 1 hour:
  - 4 • Severe complications :
    - 5 ➤ Death
    - 6 ➤ cardiac arrest
    - 7 ➤ Severe desaturation < 80%
    - 8 ➤ Severe cardiovascular collapse (systolic blood pressure < 80mmHg or the need to
    - 9 administer ephedrine or neosynephrine or norepinephrine)
  - 10 • Mild-to-moderate complications:
    - 11 ➤ Intubation failure
    - 12 ➤ Severe ventricular or supraventricular arrhythmia
    - 13 ➤ Oesophageal intubation
    - 14 ➤ Dental injury
    - 15 ➤ Dangerous agitation defined as RASS >3 (Richmond Agitation-Sedation Scale)
    - 16 ➤ Vomiting with aspiration of gastric content
    - 17 ➤ Naso-laryngo-tracheal injury or bleeding during RSI or FOI
- 18 - Per-operative respiratory monitoring:
  - 19 • Higher FiO<sub>2</sub> required to obtain SpO<sub>2</sub> > 94%
  - 20 • Higher plateau pressure at 5 min, 30 min, 1 hour after intubation
  - 21 • Higher peak pressure at 5 min, 30 min, 1 hour after intubation
  - 22 • Achievement of recruitment manoeuvres for desaturation < 95%
  - 23 • Tidal volume reduction owing to peak pressure > 40 mmHg

- 1  
2  
3 1 - Morbidity in the PACU:  
4  
5  
6 2 • Nausea or vomiting  
7  
8 3 • Inspiratory dyspnoea after extubation  
9  
10  
11 4 • Lowest SpO<sub>2</sub> recorded after extubation  
12  
13  
14 5 • Desaturation < 90% before or after extubation  
15  
16 6 • Severe desaturation < 80% before or after extubation  
17  
18  
19 7 • Oxygen therapy requirement at PACU discharge  
20  
21  
22 8 • Length of stay  
23  
24 9 • Duration of mechanical ventilation.  
25  
26  
27 10 • Non-Invasive ventilation support  
28  
29  
30 11 • Reintubation for respiratory failure  
31  
32  
33  
34

35 **13 Safety issues – Severe adverse events**

36  
37 14 Severe adverse events will be immediately declared and analysed by the Pharmacovigilance

38  
39 15 Department of the Nantes University Hospital.

40  
41  
42 16 Expected intubation related adverse events are defined as:

- 43  
44  
45 17 - Severe desaturation < 80%.  
46  
47 18 - Severe cardiovascular collapse.  
48  
49 19 - Cardiac arrest and death.  
50

51  
52 20 All of the expected or unexpected adverse events (occurring from the beginning of the preoxygenation  
53  
54 21 to the discharge of the PACU) will be collected in the e-CRF. The trial may be temporarily stopped for  
55  
56 22 an individual patient at the discretion of the attending physician if a severe adverse event is suspected  
57  
58 23 to be associated with the allocated device.  
59  
60

1

## 2 **Statistics analysis and sample size calculation**

3 The primary outcome is the occurrence (yes or no) of desaturation  $\leq 94\%$  or face mask ventilation  
4 during the intubation procedure and the 2 following minutes.

5 We hypothesise that HFNC can decrease the incidence of desaturation  $\leq 94\%$  or the need of face  
6 mask ventilation during intubation from 16% to 4% compared with the standard preoxygenation device.  
7 The incidence of desaturation during anticipated DI has not been described specifically in the literature  
8 up to now. We hypothesise a 12% reduction in desaturation with HFNC based on our previous study in  
9 the Intensive Care Unit (2019, Intensive care medicine, *in press*). Using a two-sided *t*-test with a first  
10 species risk of 5% and 80% power and considering 5% of consent withdrawal, we planned to include  
11 186 patients. We anticipated approximately 50 patients with FOI indication.

12 For the primary outcome: a logistic model will compare the incidence of desaturation  $\leq 94\%$  or face  
13 mask ventilation. Intent-to-treat and per-protocol analysis are planned for the primary outcome. We  
14 shall also perform exploratory sub-group analysis for the primary outcome regarding the type of  
15 intubation (FOI or RSI). An interim analysis will be performed after inclusion of half of the total  
16 number of patients (93 patients) to enable re-estimation of the sample size to maintain power.[23,24]  
17 The overall probability of the event will be estimated from the pooled data of both treatment groups. If  
18 necessary, the sample size will be adjusted accordingly and an amendment to the protocol will be  
19 made.

20 The secondary outcomes will be described and compared between the two groups with linear  
21 regression models, generalized mix models or survival models (Cox or Fine and Gray) according to the  
22 nature of the variable. All of the analyses will be adjusted to intubation sequence (FOI or RSI).

23 A predefined statistical analysis plan will be followed using SAS software V.9.3 (Cary, North  
24 Carolina, USA). The statistical analysis will incorporate all of the elements required by the CONSORT  
25 statement for non-pharmacological interventions.

26

1  
2  
3 1  
4  
5  
6 2 **Track record**  
7  
8 3 Data will be recorded in a web-based electronic case report form (eCRF) by the research team.  
9  
10 4 Characteristics at baseline will be gathered: age, sex, weight, height, medical history, indication for  
11  
12 5 surgery, predictive criteria of difficult mask ventilation or of difficult intubation, description of the  
13  
14 6 intubation procedure (technical aspect, drugs and adverse events). During surgery, respiratory and  
15  
16 7 cardiovascular parameters will be assessed.

18  
19 8 Any protocol deviations will be recorded in the eCRF and the medical records. To preserve the  
20  
21 9 confidentiality of personal information, data will be key-coded using alphanumerical numbers. To  
22  
23 10 minimise missing data, to improve the quality of data collection and tracking, an external assessor will  
24  
25 11 collect the variation of SpO<sub>2</sub>.

26  
27  
28  
29  
30  
31 13 **Data statement**

32  
33 14 Data set will be available on reasonable request to the corresponding author.  
34  
35  
36  
37  
38

39 16 **Monitoring**

40  
41 17 Monitoring will follow "Good Clinical Practice principles" and will be performed by the independent  
42  
43 18 promotion department of Nantes University Hospital Research Management Unit.

44  
45  
46 19 The following data will be assessed:

- 47  
48  
49 20 - Written consent after oral and written information during the anaesthesia consultation.  
50  
51 21 - Flow chart filled in for included and excluded patients.  
52  
53 22 - Trial progress.  
54  
55 23 - Primary and secondary outcome collection.  
56  
57 24 - Treatment-related severe adverse events.  
58  
59  
60

1  
2  
3 1 The eCRF is a secure, interactive, web-response system provided and managed by the biometrics unit  
4  
5 2 of the Nantes University Hospital (Nantes, France). The physicians and a clinical research nurse will  
6  
7 3 ensure compliance with the study protocol and collect the study data in the eCRFs.  
8  
9

#### 10 4 **Trial status**

11  
12 5 A total of 186 patients are expected to be included within 15 months.

13  
14  
15 6 June 2018: protocol approval by the Ethics Committee.

16  
17 7 September 2018: Start of inclusion.

18  
19  
20 8 March 2020: End of inclusion.

21  
22  
23 9 We will submit the manuscript during the second half of 2020.  
24  
25  
26  
27  
28  
29  
30  
31  
32  
33  
34  
35  
36  
37  
38  
39  
40  
41  
42  
43  
44  
45  
46  
47  
48  
49

## 11 **ETHICS AND DISSEMINATION**

### 12 **Research ethics approval.**

13 The trial will be conducted in compliance with the current version of the Declaration of Helsinki and  
14 Good Clinical Practice guidelines. The research project was approved by the appropriate Ethical Review  
15 Board (Medical Ethic Committee “PARIS, Ile-de-France 2”, registration number: 2018-04-04 RIPH2).

16 The study was registered at <http://www.clinicaltrials.gov> with trial identification number:  
17 NCT03604120 before the first inclusion.  
18

### 19 **Confidentiality**

20 The study data will be handled as requested by the French Data Protection Authority (CNIL,  
21 Commission Nationale de l'Informatique et des Libertés). All original records will be kept on file at the  
22 trial site for 15 years. The electronic trial database file will be anonymised and kept on file for 15 years.  
23  
24

### 24 **Conflict of interests**

1  
2  
3 1 This study was supported by institutional funds and a grant from Fisher & Paykel Healthcare (FPH) that  
4  
5 2 is inferior to 20% of the total budget (24,000 Euros). FPH did not participate in the study design and  
6  
7 3 will not participate in data collection, analysis and interpretation, nor in the preparation, review approval  
8  
9 4 and decision to submit the manuscript for publication.  
10  
11  
12 5

13  
14  
15 6 **Dissemination plan**  
16

17 7 The study will be published in an international medical journal.  
18  
19  
20  
21  
22  
23  
24  
25  
26  
27  
28  
29  
30  
31  
32  
33  
34  
35  
36  
37  
38  
39  
40  
41  
42  
43  
44  
45  
46  
47  
48  
49  
50  
51  
52  
53  
54  
55  
56  
57  
58  
59  
60

For peer review only

1  
2  
3 **1 DISCUSSION**  
4

5  
6 2 Among the intubation related adverse events, hypoxaemia is a life-threatening issue and this  
7  
8 3 complication is mainly encountered during difficult airway management. HFNC presents several  
9  
10 4 theoretical advantages compared with the standard face mask, including the ability to deliver continuous  
11  
12 5 oxygen flow to perform apnoeic oxygenation. Recent expert guidelines have advised the use of such a  
13  
14 6 device to prevent desaturation during DI.[5,7] However, its relevance has never been evaluated in a  
15  
16 7 large randomised study. This device could improve patient safety but, it must be evaluated before  
17  
18 8 systematic implementation in the airway control algorithm.  
19  
20  
21  
22  
23  
24  
25  
26  
27  
28  
29  
30  
31  
32  
33  
34  
35  
36  
37  
38  
39  
40  
41  
42  
43  
44  
45  
46  
47  
48  
49  
50  
51  
52  
53  
54  
55  
56  
57  
58  
59  
60

1  
2  
3 **1 ACKNOWLEDGEMENTS**  
4

5  
6 2 We are grateful to the medical staff, nurses and research staff of the Anaesthesia and Critical Care  
7  
8 3 Departments of Nantes University Hospital. We thank Ludivine Perrier for administrative and logistic  
9  
10 4 support, Coralie Ono dit Biot for creating the eCRF, and Dr Anne Chiffolleau, MD for safety monitoring.  
11  
12  
13  
14  
15  
16  
17  
18  
19  
20  
21  
22  
23  
24  
25  
26  
27  
28  
29  
30  
31  
32  
33  
34  
35  
36  
37  
38  
39  
40  
41  
42  
43  
44  
45  
46  
47  
48  
49  
50  
51  
52  
53  
54  
55  
56  
57  
58  
59  
60

For peer review only



1  
2  
3 **1 REFERENCES**  
4  
5  
6  
7  
8  
9  
10  
11  
12  
13  
14  
15  
16  
17  
18  
19  
20  
21  
22  
23  
24  
25  
26  
27  
28  
29  
30  
31  
32  
33  
34  
35  
36  
37  
38  
39  
40  
41  
42  
43  
44  
45  
46  
47  
48  
49  
50  
51  
52  
53  
54  
55  
56  
57  
58  
59  
60

- 1 Steadman J, Catalani B, Sharp C, *et al.* Life-threatening perioperative anesthetic complications: major issues surrounding perioperative morbidity and mortality. *Trauma Surg Acute Care Open* 2017;**2**:e000113. doi:10.1136/tsaco-2017-000113
- 2 Cook TM, Woodall N, Frerk C, *et al.* Major complications of airway management in the UK: results of the Fourth National Audit Project of the Royal College of Anaesthetists and the Difficult Airway Society. Part 1: anaesthesia. *British Journal of Anaesthesia* 2011;**106**:617–31. doi:10.1093/bja/aer058
- 3 Cheney FW, Posner KL, Lee LA, *et al.* Trends in anesthesia-related death and brain damage: A closed claims analysis. *Anesthesiology* 2006;**105**:1081–6.
- 4 Apfelbaum JL, Caplan RA, Hagberg CA, *et al.* Practice guidelines for management of the difficult airway: an updated report by the American Society of Anesthesiologists Task Force on Management of the Difficult Airway. *Anesthesiology*. 2013;**118**:251–70. doi:10.1097/ALN.0b013e31827773b2
- 5 Frerk C, Mitchell VS, McNarry AF, *et al.* Difficult Airway Society 2015 guidelines for management of unanticipated difficult intubation in adults†. *BJA: British Journal of Anaesthesia* 2015;**115**:827–48. doi:10.1093/bja/aev371
- 6 Workeneh SA, Gebregzi AH, Denu ZA. Magnitude and Predisposing Factors of Difficult Airway during Induction of General Anaesthesia. *Anesthesiol Res Pract* 2017;**2017**:5836397–6. doi:10.1155/2017/5836397
- 7 Langeron O, Bourgain J-L, Francon D, *et al.* Difficult intubation and extubation in adult anaesthesia. *Anesthésie & Réanimation* 2017;**3**:552–71. doi:10.1016/j.anrea.2017.09.003
- 8 Simon M, Wachs C, Braune S, *et al.* High-Flow Nasal Cannula Versus Bag-Valve-Mask for Preoxygenation Before Intubation in Subjects With Hypoxemic Respiratory Failure. *Respiratory Care* 2016;**61**:1160–7. doi:10.4187/respcare.04413
- 9 Jaber S, Monnin M, Girard M, *et al.* Apnoeic oxygenation via high-flow nasal cannula oxygen combined with non-invasive ventilation preoxygenation for intubation in hypoxaemic patients in the intensive care unit: the single-centre, blinded, randomised controlled OPTINIV trial. *Intensive Care Medicine* 2016;**42**:1877–87. doi:10.1007/s00134-016-4588-9
- 10 Voure'h M, Asfar P, Volteau C, *et al.* High-Flow nasal cannula oxygen during endotracheal intubation in hypoxemic patients: A randomized controlled clinical trial. *Intensive Care Medicine* 2015;:1–11. doi:10.1007/s00134-015-3796-z
- 11 Patel A, Nouraei SAR. Transnasal Humidified Rapid-Insufflation Ventilatory Exchange (THRIVE): a physiological method of increasing apnoea time in patients with difficult airways. *Anaesthesia* 2015;**70**:323–9. doi:10.1111/anae.12923
- 12 Badiger S, John M, Fearnley RA, *et al.* Optimizing oxygenation and intubation conditions during awake fibre-optic intubation using a high-flow nasal oxygen-delivery system. *British Journal of Anaesthesia* 2015;**115**:629–32. doi:10.1093/bja/aev262
- 13 Roca O, Riera J, Torres F, *et al.* High-flow oxygen therapy in acute respiratory failure. *Respiratory Care* 2010;**55**:408–13.

- 1  
2  
3 1 14 Vargas F, Saint-Leger M, Boyer A, *et al.* Physiologic Effects of High-Flow Nasal Cannula  
4 2 Oxygen in Critical Care Subjects. *Respiratory Care* 2015;**60**:1369–76.  
5 3 doi:10.4187/respcare.03814  
6  
7 4 15 Russotto V, Cortegiani A, Raineri SM, *et al.* Respiratory support techniques to avoid  
8 5 desaturation in critically ill patients requiring endotracheal intubation: A systematic review and  
9 6 meta-analysis. *Journal of Critical Care* 2017;**41**:98–106. doi:10.1016/j.jcrc.2017.05.003  
10  
11 7 16 Roth D, Pace NL, Lee A, *et al.* Airway physical examination tests for detection of difficult  
12 8 airway management in apparently normal adult patients. *The Cochrane database of systematic*  
13 9 *reviews* 2018;**5**:CD008874. doi:10.1002/14651858.CD008874.pub2  
14  
15 10 17 Lundstrøm LH, Møller AM, Rosenstock C, *et al.* A documented previous difficult tracheal  
16 11 intubation as a prognostic test for a subsequent difficult tracheal intubation in adults. *Anaesthesia*  
17 12 2009;**64**:1081–8. doi:10.1111/j.1365-2044.2009.06057.x  
18  
19 13 18 Cormack RS. Cormack-Lehane classification revisited. *British Journal of Anaesthesia*  
20 14 2010;**105**:867–8. doi:10.1093/bja/aeq324  
21  
22 15 19 Adnet F, Borron SW, Racine SX, *et al.* The intubation difficulty scale (IDS): proposal and  
23 16 evaluation of a new score characterizing the complexity of endotracheal intubation.  
24 17 *Anesthesiology* 1997;**87**:1290–7.  
25  
26 18 20 American Society of Anesthesiologists Task Force on Management of the Difficult Airway.  
27 19 Practice guidelines for management of the difficult airway: an updated report by the American  
28 20 Society of Anesthesiologists Task Force on Management of the Difficult Airway.  
29 21 *Anesthesiology*. 2003;**98**:1269–77.  
30  
31 22 21 Rai MR, Parry TM, Dombrovskis A, *et al.* Remifentanyl target-controlled infusion vs propofol  
32 23 target-controlled infusion for conscious sedation for awake fiberoptic intubation: a double-  
33 24 blinded randomized controlled trial. *British Journal of Anaesthesia* 2008;**100**:125–30.  
34 25 doi:10.1093/bja/aem279  
35  
36 26 22 Dhasmana SC. Nasotracheal fiberoptic intubation: patient comfort, intubating conditions and  
37 27 hemodynamic stability during conscious sedation with different doses of dexmedetomidine. *J*  
38 28 *Maxillofac Oral Surg* 2014;**13**:53–8. doi:10.1007/s12663-012-0469-0  
39  
40 29 23 Friede T, Kieser M. Sample size recalculation for binary data in internal pilot study designs.  
41 30 *Pharmaceutical Statistics* 2004;**3**:269–79. doi:10.1002/pst.140  
42  
43 31 24 Friede T, Kieser M. Sample size recalculation in internal pilot study designs: a review. *Biom J*  
44 32 2006;**48**:537–55.  
45  
46  
47  
48  
49

#### 50 34 **AUTHORS CONTRIBUTION**

51  
52  
53 35 KA and MV obtained funding. KA, SJ, DH, GB, AG, MS, MT, CG and MV designed the study. FF and  
54  
55 36 AC planned the statistical analysis. KA and MV will have full access to the final trial dataset. All authors  
56  
57 37 participated in the writing the manuscript and approved the final version.  
58  
59  
60

1  
2  
3 **1 FUNDING**  
4  
5

6 2 The PREOPTIDAM trial is supported by the University Hospital of Nantes and a grant from Fisher &  
7  
8 3 Paykel Healthcare (FPH) that is inferior to 20% of the total budget (24,000 Euros).  
9

10  
11  
12 **4 DISCLAIMER**  
13  
14

15 5 The funding sources had no role in the trial design, trial conduct, data handling, data analysis or  
16  
17 6 writing and publication of the manuscript.  
18  
19

20  
21 **7 COMPETING INTERESTS**  
22  
23

24 8 MV reports personal fees from MSD, Pfizer, Baxter, grants from Fischer Paykel, outside the submitted  
25  
26 9 work. SJ reports personal fees from Draeger, Fresenius-Xenios and Fisher Paykel Healthcare, outside  
27  
28 10 the submitted work. Karim Asehnoune declares personal fees from Fisher Paykel Healthcare, Baxter,  
29  
30 11 LFB, Fresenius. The other authors declared to have no conflict of interest.  
31  
32

33 **12 PATIENT CONSENT**  
34  
35

36 13 Oral and written consent required.  
37  
38

39  
40 **14 ETHICS APPROVAL**  
41  
42

43 15 By 11 June 2018 the study had been approved by a central ethics committee (Comité de Protection des  
44  
45 16 Personnes Ile-de-France II, Paris, France), reference: 2018-04-04 RIPH2  
46  
47  
48  
49  
50  
51  
52  
53  
54  
55  
56  
57  
58  
59  
60

1  
2  
3 1 **Tables and Figures**  
4

5  
6 2 **Title Table 1:** Participants timeline  
7

8 3 **Legends Table 1:** After written informed consent, the patients will be randomised and preoxygenation  
9  
10 4 will be performed accordingly. Patients will be followed until the Post-Anesthesia Care Unit (PACU)  
11  
12 5 discharge.  
13  
14

15 6

16  
17  
18 7 **Title Figure 1:** Study design  
19

20  
21 8 **Legend Figure 1:** After attending physician decision to perform RSI or fiberoptic intubation, patients  
22  
23 9 will be randomised to receive HFNC or Face mask oxygenation. **FOI:** Fiberoptic Intubation, **HFNC:**  
24  
25 10 High Flow Nasal Cannula, **FiO<sub>2</sub>:** Fraction of inspired oxygen  
26  
27  
28  
29  
30  
31  
32  
33  
34  
35  
36  
37  
38  
39  
40  
41  
42  
43  
44  
45  
46  
47  
48  
49  
50  
51  
52  
53  
54  
55  
56  
57  
58  
59  
60

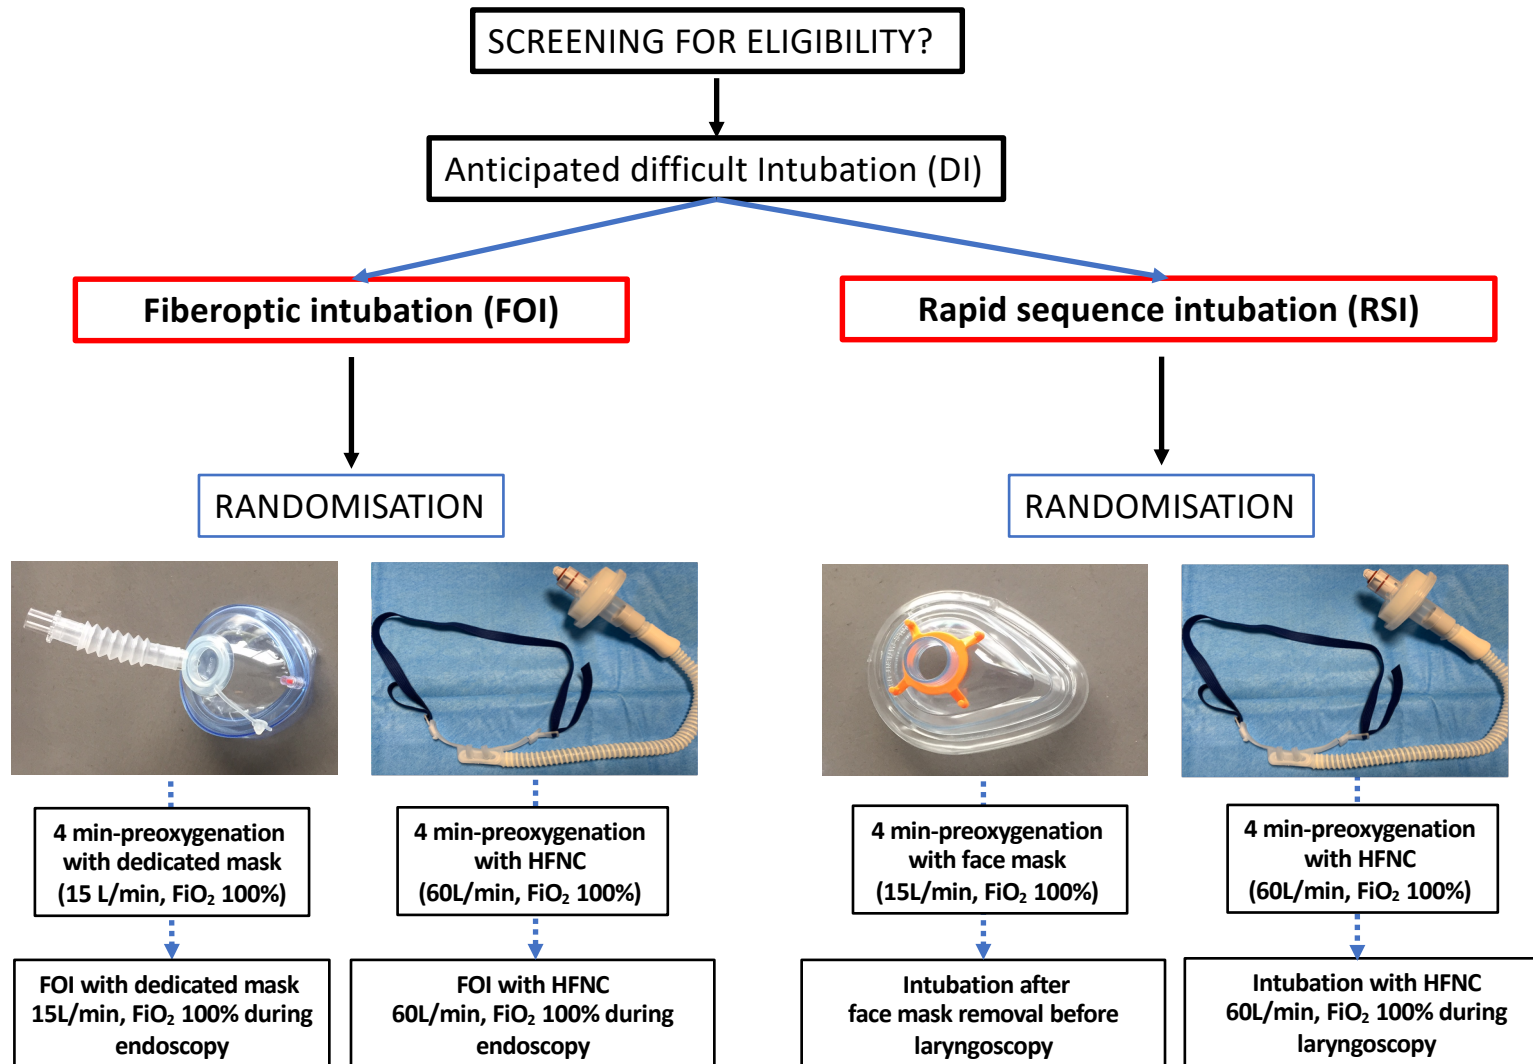

# Reporting checklist for protocol of a clinical trial.

Based on the SPIRIT guidelines.

## Instructions to authors

Complete this checklist by entering the page numbers from your manuscript where readers will find each of the items listed below.

Your article may not currently address all the items on the checklist. Please modify your text to include the missing information. If you are certain that an item does not apply, please write "n/a" and provide a short explanation.

Upload your completed checklist as an extra file when you submit to a journal.

In your methods section, say that you used the SPIRIT reporting guidelines, and cite them as:

Chan A-W, Tetzlaff JM, Altman DG, Laupacis A, Gøtzsche PC, Krleža-Jerić K, Hróbjartsson A, Mann H, Dickersin K, Berlin J, Doré C, Parulekar W, Summerskill W, Groves T, Schulz K, Sox H, Rockhold FW, Rennie D, Moher D. SPIRIT 2013 Statement: Defining standard protocol items for clinical trials. *Ann Intern Med.* 2013;158(3):200-207

|                                             |     | Reporting Item                                                                                               | Page Number |
|---------------------------------------------|-----|--------------------------------------------------------------------------------------------------------------|-------------|
| Title                                       | #1  | Descriptive title identifying the study design, population, interventions, and, if applicable, trial acronym | 1           |
| Trial registration                          | #2a | Trial identifier and registry name. If not yet registered, name of intended registry                         | 3           |
| Trial registration: data set                | #2b | All items from the World Health Organization Trial Registration Data Set                                     | NA          |
| Protocol version                            | #3  | Date and version identifier                                                                                  | 3           |
| Funding                                     | #4  | Sources and types of financial, material, and other support                                                  | 22          |
| Roles and responsibilities: contributorship | #5a | Names, affiliations, and roles of protocol contributors                                                      | 1+22        |
| Roles and responsibilities:                 | #5b | Name and contact information for the trial sponsor                                                           | 1           |

|    |                      |      |                                                              |       |
|----|----------------------|------|--------------------------------------------------------------|-------|
| 1  | sponsor contact      |      |                                                              |       |
| 2  | information          |      |                                                              |       |
| 3  |                      |      |                                                              |       |
| 4  | Roles and            | #5c  | Role of study sponsor and funders, if any, in study design;  | 22    |
| 5  | responsibilities:    |      | collection, management, analysis, and interpretation of      |       |
| 6  | sponsor and funder   |      | data; writing of the report; and the decision to submit the  |       |
| 7  |                      |      | report for publication, including whether they will have     |       |
| 8  |                      |      | ultimate authority over any of these activities              |       |
| 9  |                      |      |                                                              |       |
| 10 |                      |      |                                                              |       |
| 11 |                      |      |                                                              |       |
| 12 | Roles and            | #5d  | Composition, roles, and responsibilities of the coordinating | 17+22 |
| 13 | responsibilities:    |      | centre, steering committee, endpoint adjudication            |       |
| 14 | committees           |      | committee, data management team, and other individuals       |       |
| 15 |                      |      | or groups overseeing the trial, if applicable (see Item 21a  |       |
| 16 |                      |      | for data monitoring committee)                               |       |
| 17 |                      |      |                                                              |       |
| 18 |                      |      |                                                              |       |
| 19 |                      |      |                                                              |       |
| 20 | Background and       | #6a  | Description of research question and justification for       | 5+6   |
| 21 | rationale            |      | undertaking the trial, including summary of relevant         |       |
| 22 |                      |      | studies (published and unpublished) examining benefits       |       |
| 23 |                      |      | and harms for each intervention                              |       |
| 24 |                      |      |                                                              |       |
| 25 |                      |      |                                                              |       |
| 26 |                      |      |                                                              |       |
| 27 | Background and       | #6b  | Explanation for choice of comparators                        | 5     |
| 28 | rationale: choice of |      |                                                              |       |
| 29 | comparators          |      |                                                              |       |
| 30 |                      |      |                                                              |       |
| 31 |                      |      |                                                              |       |
| 32 | Objectives           | #7   | Specific objectives or hypotheses                            | 6-7   |
| 33 |                      |      |                                                              |       |
| 34 |                      |      |                                                              |       |
| 35 | Trial design         | #8   | Description of trial design including type of trial (eg,     | 7     |
| 36 |                      |      | parallel group, crossover, factorial, single group),         |       |
| 37 |                      |      | allocation ratio, and framework (eg, superiority,            |       |
| 38 |                      |      | equivalence, non-inferiority, exploratory)                   |       |
| 39 |                      |      |                                                              |       |
| 40 |                      |      |                                                              |       |
| 41 |                      |      |                                                              |       |
| 42 | Study setting        | #9   | Description of study settings (eg, community clinic,         | 7     |
| 43 |                      |      | academic hospital) and list of countries where data will be  |       |
| 44 |                      |      | collected. Reference to where list of study sites can be     |       |
| 45 |                      |      | obtained                                                     |       |
| 46 |                      |      |                                                              |       |
| 47 |                      |      |                                                              |       |
| 48 | Eligibility criteria | #10  | Inclusion and exclusion criteria for participants. If        | 8-9   |
| 49 |                      |      | applicable, eligibility criteria for study centres and       |       |
| 50 |                      |      | individuals who will perform the interventions (eg,          |       |
| 51 |                      |      | surgeons, psychotherapists)                                  |       |
| 52 |                      |      |                                                              |       |
| 53 |                      |      |                                                              |       |
| 54 |                      |      |                                                              |       |
| 55 | Interventions:       | #11a | Interventions for each group with sufficient detail to allow | 10    |
| 56 | description          |      | replication, including how and when they will be             |       |
| 57 |                      |      | administered                                                 |       |
| 58 |                      |      |                                                              |       |
| 59 |                      |      |                                                              |       |
| 60 |                      |      |                                                              |       |

|    |                      |      |                                                             |          |
|----|----------------------|------|-------------------------------------------------------------|----------|
| 1  | Interventions:       | #11b | Criteria for discontinuing or modifying allocated           | 11       |
| 2  | modifications        |      | interventions for a given trial participant (eg, drug dose  |          |
| 3  |                      |      | change in response to harms, participant request, or        |          |
| 4  |                      |      | improving / worsening disease)                              |          |
| 5  |                      |      |                                                             |          |
| 6  |                      |      |                                                             |          |
| 7  |                      |      |                                                             |          |
| 8  | Interventions:       | #11c | Strategies to improve adherence to intervention protocols,  | NA       |
| 9  | adherence            |      | and any procedures for monitoring adherence (eg, drug       |          |
| 10 |                      |      | tablet return; laboratory tests)                            |          |
| 11 |                      |      |                                                             |          |
| 12 |                      |      |                                                             |          |
| 13 | Interventions:       | #11d | Relevant concomitant care and interventions that are        | 10       |
| 14 | concomitant care     |      | permitted or prohibited during the trial                    |          |
| 15 |                      |      |                                                             |          |
| 16 |                      |      |                                                             |          |
| 17 | Outcomes             | #12  | Primary, secondary, and other outcomes, including the       | 12+13+14 |
| 18 |                      |      | specific measurement variable (eg, systolic blood           |          |
| 19 |                      |      | pressure), analysis metric (eg, change from baseline, final |          |
| 20 |                      |      | value, time to event), method of aggregation (eg, median,   |          |
| 21 |                      |      | proportion), and time point for each outcome. Explanation   |          |
| 22 |                      |      | of the clinical relevance of chosen efficacy and harm       |          |
| 23 |                      |      | outcomes is strongly recommended                            |          |
| 24 |                      |      |                                                             |          |
| 25 |                      |      |                                                             |          |
| 26 |                      |      |                                                             |          |
| 27 |                      |      |                                                             |          |
| 28 | Participant timeline | #13  | Time schedule of enrolment, interventions (including any    | 11       |
| 29 |                      |      | run-ins and washouts), assessments, and visits for          |          |
| 30 |                      |      | participants. A schematic diagram is highly recommended     |          |
| 31 |                      |      | (see Figure)                                                |          |
| 32 |                      |      |                                                             |          |
| 33 |                      |      |                                                             |          |
| 34 |                      |      |                                                             |          |
| 35 | Sample size          | #14  | Estimated number of participants needed to achieve study    | 15       |
| 36 |                      |      | objectives and how it was determined, including clinical    |          |
| 37 |                      |      | and statistical assumptions supporting any sample size      |          |
| 38 |                      |      | calculations                                                |          |
| 39 |                      |      |                                                             |          |
| 40 |                      |      |                                                             |          |
| 41 |                      |      |                                                             |          |
| 42 | Recruitment          | #15  | Strategies for achieving adequate participant enrolment to  | 8+10     |
| 43 |                      |      | reach target sample size                                    |          |
| 44 |                      |      |                                                             |          |
| 45 |                      |      |                                                             |          |
| 46 | Allocation: sequence | #16a | Method of generating the allocation sequence (eg,           | 9        |
| 47 | generation           |      | computer-generated random numbers), and list of any         |          |
| 48 |                      |      | factors for stratification. To reduce predictability of a   |          |
| 49 |                      |      | random sequence, details of any planned restriction (eg,    |          |
| 50 |                      |      | blocking) should be provided in a separate document that    |          |
| 51 |                      |      | is unavailable to those who enrol participants or assign    |          |
| 52 |                      |      | interventions                                               |          |
| 53 |                      |      |                                                             |          |
| 54 |                      |      |                                                             |          |
| 55 |                      |      |                                                             |          |
| 56 |                      |      |                                                             |          |
| 57 | Allocation           | #16b | Mechanism of implementing the allocation sequence (eg,      | 9        |
| 58 | concealment          |      | central telephone; sequentially numbered, opaque, sealed    |          |
| 59 |                      |      |                                                             |          |
| 60 |                      |      |                                                             |          |



|    |                        |      |                                                                                                                                                                                                                                                                                                                                                                                                              |       |
|----|------------------------|------|--------------------------------------------------------------------------------------------------------------------------------------------------------------------------------------------------------------------------------------------------------------------------------------------------------------------------------------------------------------------------------------------------------------|-------|
| 1  | mechanism              |      | envelopes), describing any steps to conceal the sequence until interventions are assigned                                                                                                                                                                                                                                                                                                                    |       |
| 2  |                        |      |                                                                                                                                                                                                                                                                                                                                                                                                              |       |
| 3  |                        |      |                                                                                                                                                                                                                                                                                                                                                                                                              |       |
| 4  | Allocation:            | #16c | Who will generate the allocation sequence, who will enrol participants, and who will assign participants to interventions                                                                                                                                                                                                                                                                                    | 7+8+9 |
| 5  | implementation         |      |                                                                                                                                                                                                                                                                                                                                                                                                              |       |
| 6  |                        |      |                                                                                                                                                                                                                                                                                                                                                                                                              |       |
| 7  |                        |      |                                                                                                                                                                                                                                                                                                                                                                                                              |       |
| 8  |                        |      |                                                                                                                                                                                                                                                                                                                                                                                                              |       |
| 9  | Blinding (masking)     | #17a | Who will be blinded after assignment to interventions (eg, trial participants, care providers, outcome assessors, data analysts), and how                                                                                                                                                                                                                                                                    | 10    |
| 10 |                        |      |                                                                                                                                                                                                                                                                                                                                                                                                              |       |
| 11 |                        |      |                                                                                                                                                                                                                                                                                                                                                                                                              |       |
| 12 |                        |      |                                                                                                                                                                                                                                                                                                                                                                                                              |       |
| 13 |                        |      |                                                                                                                                                                                                                                                                                                                                                                                                              |       |
| 14 | Blinding (masking):    | #17b | If blinded, circumstances under which unblinding is permissible, and procedure for revealing a participant's allocated intervention during the trial                                                                                                                                                                                                                                                         | NA    |
| 15 | emergency              |      |                                                                                                                                                                                                                                                                                                                                                                                                              |       |
| 16 | unblinding             |      |                                                                                                                                                                                                                                                                                                                                                                                                              |       |
| 17 |                        |      |                                                                                                                                                                                                                                                                                                                                                                                                              |       |
| 18 |                        |      |                                                                                                                                                                                                                                                                                                                                                                                                              |       |
| 19 |                        |      |                                                                                                                                                                                                                                                                                                                                                                                                              |       |
| 20 | Data collection plan   | #18a | Plans for assessment and collection of outcome, baseline, and other trial data, including any related processes to promote data quality (eg, duplicate measurements, training of assessors) and a description of study instruments (eg, questionnaires, laboratory tests) along with their reliability and validity, if known. Reference to where data collection forms can be found, if not in the protocol | 16    |
| 21 |                        |      |                                                                                                                                                                                                                                                                                                                                                                                                              |       |
| 22 |                        |      |                                                                                                                                                                                                                                                                                                                                                                                                              |       |
| 23 |                        |      |                                                                                                                                                                                                                                                                                                                                                                                                              |       |
| 24 |                        |      |                                                                                                                                                                                                                                                                                                                                                                                                              |       |
| 25 |                        |      |                                                                                                                                                                                                                                                                                                                                                                                                              |       |
| 26 |                        |      |                                                                                                                                                                                                                                                                                                                                                                                                              |       |
| 27 |                        |      |                                                                                                                                                                                                                                                                                                                                                                                                              |       |
| 28 |                        |      |                                                                                                                                                                                                                                                                                                                                                                                                              |       |
| 29 |                        |      |                                                                                                                                                                                                                                                                                                                                                                                                              |       |
| 30 |                        |      |                                                                                                                                                                                                                                                                                                                                                                                                              |       |
| 31 |                        |      |                                                                                                                                                                                                                                                                                                                                                                                                              |       |
| 32 |                        |      |                                                                                                                                                                                                                                                                                                                                                                                                              |       |
| 33 | Data collection plan:  | #18b | Plans to promote participant retention and complete follow-up, including list of any outcome data to be collected for participants who discontinue or deviate from intervention protocols                                                                                                                                                                                                                    | 16    |
| 34 | retention              |      |                                                                                                                                                                                                                                                                                                                                                                                                              |       |
| 35 |                        |      |                                                                                                                                                                                                                                                                                                                                                                                                              |       |
| 36 |                        |      |                                                                                                                                                                                                                                                                                                                                                                                                              |       |
| 37 |                        |      |                                                                                                                                                                                                                                                                                                                                                                                                              |       |
| 38 |                        |      |                                                                                                                                                                                                                                                                                                                                                                                                              |       |
| 39 | Data management        | #19  | Plans for data entry, coding, security, and storage, including any related processes to promote data quality (eg, double data entry; range checks for data values). Reference to where details of data management procedures can be found, if not in the protocol                                                                                                                                            | 16+18 |
| 40 |                        |      |                                                                                                                                                                                                                                                                                                                                                                                                              |       |
| 41 |                        |      |                                                                                                                                                                                                                                                                                                                                                                                                              |       |
| 42 |                        |      |                                                                                                                                                                                                                                                                                                                                                                                                              |       |
| 43 |                        |      |                                                                                                                                                                                                                                                                                                                                                                                                              |       |
| 44 |                        |      |                                                                                                                                                                                                                                                                                                                                                                                                              |       |
| 45 |                        |      |                                                                                                                                                                                                                                                                                                                                                                                                              |       |
| 46 |                        |      |                                                                                                                                                                                                                                                                                                                                                                                                              |       |
| 47 |                        |      |                                                                                                                                                                                                                                                                                                                                                                                                              |       |
| 48 | Statistics: outcomes   | #20a | Statistical methods for analysing primary and secondary outcomes. Reference to where other details of the statistical analysis plan can be found, if not in the protocol                                                                                                                                                                                                                                     | 15+16 |
| 49 |                        |      |                                                                                                                                                                                                                                                                                                                                                                                                              |       |
| 50 |                        |      |                                                                                                                                                                                                                                                                                                                                                                                                              |       |
| 51 |                        |      |                                                                                                                                                                                                                                                                                                                                                                                                              |       |
| 52 |                        |      |                                                                                                                                                                                                                                                                                                                                                                                                              |       |
| 53 | Statistics: additional | #20b | Methods for any additional analyses (eg, subgroup and adjusted analyses)                                                                                                                                                                                                                                                                                                                                     | 15+16 |
| 54 | analyses               |      |                                                                                                                                                                                                                                                                                                                                                                                                              |       |
| 55 |                        |      |                                                                                                                                                                                                                                                                                                                                                                                                              |       |
| 56 |                        |      |                                                                                                                                                                                                                                                                                                                                                                                                              |       |
| 57 | Statistics: analysis   | #20c | Definition of analysis population relating to protocol non-adherence (eg, as randomised analysis), and any                                                                                                                                                                                                                                                                                                   | 15    |
| 58 | population and         |      |                                                                                                                                                                                                                                                                                                                                                                                                              |       |
| 59 |                        |      |                                                                                                                                                                                                                                                                                                                                                                                                              |       |
| 60 |                        |      |                                                                                                                                                                                                                                                                                                                                                                                                              |       |

|    |                                         |      |                                                                                                                                                                                                                                                                                                                                       |          |
|----|-----------------------------------------|------|---------------------------------------------------------------------------------------------------------------------------------------------------------------------------------------------------------------------------------------------------------------------------------------------------------------------------------------|----------|
| 1  | missing data                            |      | statistical methods to handle missing data (eg, multiple imputation)                                                                                                                                                                                                                                                                  |          |
| 2  |                                         |      |                                                                                                                                                                                                                                                                                                                                       |          |
| 3  |                                         |      |                                                                                                                                                                                                                                                                                                                                       |          |
| 4  | Data monitoring:<br>formal committee    | #21a | Composition of data monitoring committee (DMC); summary of its role and reporting structure; statement of whether it is independent from the sponsor and competing interests; and reference to where further details about its charter can be found, if not in the protocol. Alternatively, an explanation of why a DMC is not needed | 17       |
| 5  |                                         |      |                                                                                                                                                                                                                                                                                                                                       |          |
| 6  |                                         |      |                                                                                                                                                                                                                                                                                                                                       |          |
| 7  |                                         |      |                                                                                                                                                                                                                                                                                                                                       |          |
| 8  |                                         |      |                                                                                                                                                                                                                                                                                                                                       |          |
| 9  |                                         |      |                                                                                                                                                                                                                                                                                                                                       |          |
| 10 |                                         |      |                                                                                                                                                                                                                                                                                                                                       |          |
| 11 |                                         |      |                                                                                                                                                                                                                                                                                                                                       |          |
| 12 |                                         |      |                                                                                                                                                                                                                                                                                                                                       |          |
| 13 |                                         |      |                                                                                                                                                                                                                                                                                                                                       |          |
| 14 | Data monitoring:<br>interim analysis    | #21b | Description of any interim analyses and stopping guidelines, including who will have access to these interim results and make the final decision to terminate the trial                                                                                                                                                               | 15       |
| 15 |                                         |      |                                                                                                                                                                                                                                                                                                                                       |          |
| 16 |                                         |      |                                                                                                                                                                                                                                                                                                                                       |          |
| 17 |                                         |      |                                                                                                                                                                                                                                                                                                                                       |          |
| 18 |                                         |      |                                                                                                                                                                                                                                                                                                                                       |          |
| 19 | Harms                                   | #22  | Plans for collecting, assessing, reporting, and managing solicited and spontaneously reported adverse events and other unintended effects of trial interventions or trial conduct                                                                                                                                                     | 14+15+16 |
| 20 |                                         |      |                                                                                                                                                                                                                                                                                                                                       |          |
| 21 |                                         |      |                                                                                                                                                                                                                                                                                                                                       |          |
| 22 |                                         |      |                                                                                                                                                                                                                                                                                                                                       |          |
| 23 |                                         |      |                                                                                                                                                                                                                                                                                                                                       |          |
| 24 |                                         |      |                                                                                                                                                                                                                                                                                                                                       |          |
| 25 |                                         |      |                                                                                                                                                                                                                                                                                                                                       |          |
| 26 | Auditing                                | #23  | Frequency and procedures for auditing trial conduct, if any, and whether the process will be independent from investigators and the sponsor                                                                                                                                                                                           | 17       |
| 27 |                                         |      |                                                                                                                                                                                                                                                                                                                                       |          |
| 28 |                                         |      |                                                                                                                                                                                                                                                                                                                                       |          |
| 29 |                                         |      |                                                                                                                                                                                                                                                                                                                                       |          |
| 30 |                                         |      |                                                                                                                                                                                                                                                                                                                                       |          |
| 31 | Research ethics<br>approval             | #24  | Plans for seeking research ethics committee / institutional review board (REC / IRB) approval                                                                                                                                                                                                                                         | 18       |
| 32 |                                         |      |                                                                                                                                                                                                                                                                                                                                       |          |
| 33 |                                         |      |                                                                                                                                                                                                                                                                                                                                       |          |
| 34 |                                         |      |                                                                                                                                                                                                                                                                                                                                       |          |
| 35 | Protocol<br>amendments                  | #25  | Plans for communicating important protocol modifications (eg, changes to eligibility criteria, outcomes, analyses) to relevant parties (eg, investigators, REC / IRBs, trial participants, trial registries, journals, regulators)                                                                                                    | NA       |
| 36 |                                         |      |                                                                                                                                                                                                                                                                                                                                       |          |
| 37 |                                         |      |                                                                                                                                                                                                                                                                                                                                       |          |
| 38 |                                         |      |                                                                                                                                                                                                                                                                                                                                       |          |
| 39 |                                         |      |                                                                                                                                                                                                                                                                                                                                       |          |
| 40 |                                         |      |                                                                                                                                                                                                                                                                                                                                       |          |
| 41 |                                         |      |                                                                                                                                                                                                                                                                                                                                       |          |
| 42 | Consent or assent                       | #26a | Who will obtain informed consent or assent from potential trial participants or authorised surrogates, and how (see Item 32)                                                                                                                                                                                                          | 8+10     |
| 43 |                                         |      |                                                                                                                                                                                                                                                                                                                                       |          |
| 44 |                                         |      |                                                                                                                                                                                                                                                                                                                                       |          |
| 45 |                                         |      |                                                                                                                                                                                                                                                                                                                                       |          |
| 46 |                                         |      |                                                                                                                                                                                                                                                                                                                                       |          |
| 47 | Consent or assent:<br>ancillary studies | #26b | Additional consent provisions for collection and use of participant data and biological specimens in ancillary studies, if applicable                                                                                                                                                                                                 | NA       |
| 48 |                                         |      |                                                                                                                                                                                                                                                                                                                                       |          |
| 49 |                                         |      |                                                                                                                                                                                                                                                                                                                                       |          |
| 50 |                                         |      |                                                                                                                                                                                                                                                                                                                                       |          |
| 51 |                                         |      |                                                                                                                                                                                                                                                                                                                                       |          |
| 52 | Confidentiality                         | #27  | How personal information about potential and enrolled participants will be collected, shared, and maintained in order to protect confidentiality before, during, and after the trial                                                                                                                                                  | 16+18    |
| 53 |                                         |      |                                                                                                                                                                                                                                                                                                                                       |          |
| 54 |                                         |      |                                                                                                                                                                                                                                                                                                                                       |          |
| 55 |                                         |      |                                                                                                                                                                                                                                                                                                                                       |          |
| 56 |                                         |      |                                                                                                                                                                                                                                                                                                                                       |          |
| 57 |                                         |      |                                                                                                                                                                                                                                                                                                                                       |          |
| 58 |                                         |      |                                                                                                                                                                                                                                                                                                                                       |          |
| 59 |                                         |      |                                                                                                                                                                                                                                                                                                                                       |          |
| 60 |                                         |      |                                                                                                                                                                                                                                                                                                                                       |          |

|    |                       |      |                                                                 |       |
|----|-----------------------|------|-----------------------------------------------------------------|-------|
| 1  | Declaration of        | #28  | Financial and other competing interests for principal           | 18+22 |
| 2  | interests             |      | investigators for the overall trial and each study site         |       |
| 3  |                       |      |                                                                 |       |
| 4  |                       |      |                                                                 |       |
| 5  | Data access           | #29  | Statement of who will have access to the final trial dataset,   | 16+22 |
| 6  |                       |      | and disclosure of contractual agreements that limit such        |       |
| 7  |                       |      | access for investigators                                        |       |
| 8  |                       |      |                                                                 |       |
| 9  |                       |      |                                                                 |       |
| 10 | Ancillary and post    | #30  | Provisions, if any, for ancillary and post-trial care, and for  | NA    |
| 11 | trial care            |      | compensation to those who suffer harm from trial                |       |
| 12 |                       |      | participation                                                   |       |
| 13 |                       |      |                                                                 |       |
| 14 |                       |      |                                                                 |       |
| 15 | Dissemination         | #31a | Plans for investigators and sponsor to communicate trial        | 18    |
| 16 | policy: trial results |      | results to participants, healthcare professionals, the          |       |
| 17 |                       |      | public, and other relevant groups (eg, via publication,         |       |
| 18 |                       |      | reporting in results databases, or other data sharing           |       |
| 19 |                       |      | arrangements), including any publication restrictions           |       |
| 20 |                       |      |                                                                 |       |
| 21 |                       |      |                                                                 |       |
| 22 |                       |      |                                                                 |       |
| 23 |                       |      |                                                                 |       |
| 24 | Dissemination         | #31b | Authorship eligibility guidelines and any intended use of       | NA    |
| 25 | policy: authorship    |      | professional writers                                            |       |
| 26 |                       |      |                                                                 |       |
| 27 |                       |      |                                                                 |       |
| 28 | Dissemination         | #31c | Plans, if any, for granting public access to the full protocol, | 16    |
| 29 | policy: reproducible  |      | participant-level dataset, and statistical code                 |       |
| 30 | research              |      |                                                                 |       |
| 31 |                       |      |                                                                 |       |
| 32 |                       |      |                                                                 |       |
| 33 | Informed consent      | #32  | Model consent form and other related documentation              | NA    |
| 34 | materials             |      | given to participants and authorised surrogates                 |       |
| 35 |                       |      |                                                                 |       |
| 36 |                       |      |                                                                 |       |
| 37 | Biological specimens  | #33  | Plans for collection, laboratory evaluation, and storage of     | NA    |
| 38 |                       |      | biological specimens for genetic or molecular analysis in       |       |
| 39 |                       |      | the current trial and for future use in ancillary studies, if   |       |
| 40 |                       |      | applicable                                                      |       |
| 41 |                       |      |                                                                 |       |
| 42 |                       |      |                                                                 |       |

43 The SPIRIT checklist is distributed under the terms of the Creative Commons Attribution License CC-  
 44 BY-ND 3.0. This checklist was completed on 02. August 2018 using <http://www.goodreports.org/>, a  
 45 tool made by the [EQUATOR Network](#) in collaboration with [Penelope.ai](#)  
 46  
 47  
 48  
 49  
 50  
 51  
 52  
 53  
 54  
 55  
 56  
 57  
 58  
 59  
 60
